# Supplementary material for: Transcriptomes and Proteomes Define Gene Expression Progression in Pre-meiotic Maize Anthers
Source: Oxford University Press journal article supplement (doi:10.1534/g3.113.009738), 2014-06-01
Supplement: 993_figures1.pdf [file 993_figures1.pdf]

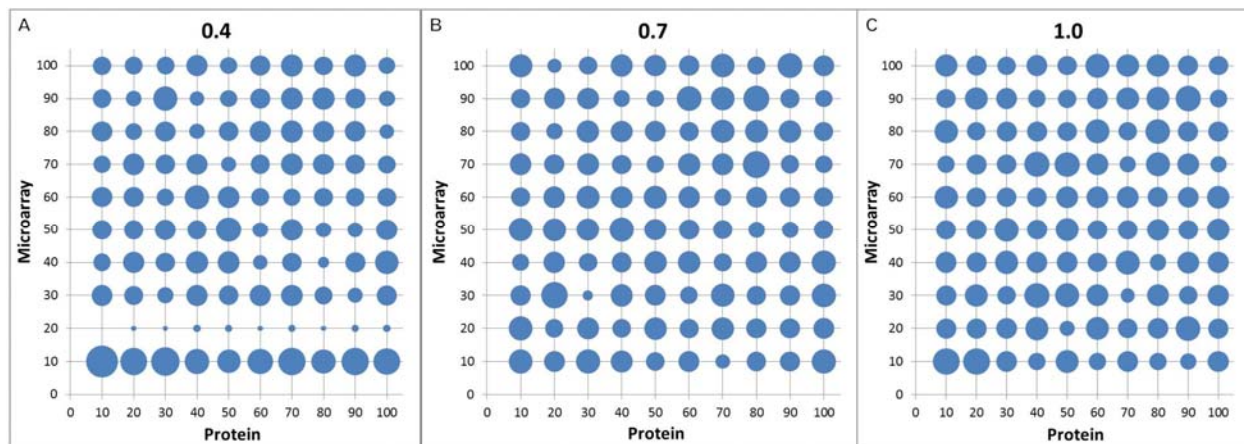

**Figure S1** Decile comparisons of transcriptomes and proteomes at three stages. Comparison of protein and transcript abundances at three developmental stages: 0.4, 0.7, and 1.0 mm. Data were divided into ten bins based on abundance. Circle diameters reflect the number of protein-transcript matches in each of the 100 bins.
