# Supplementary material for: Transcriptomes and Proteomes Define Gene Expression Progression in Pre-meiotic Maize Anthers
Source: Oxford University Press journal article supplement (doi:10.1534/g3.113.009738), 2014-06-01
Supplement: 993_figures2.pdf [file 993_figures2.pdf]

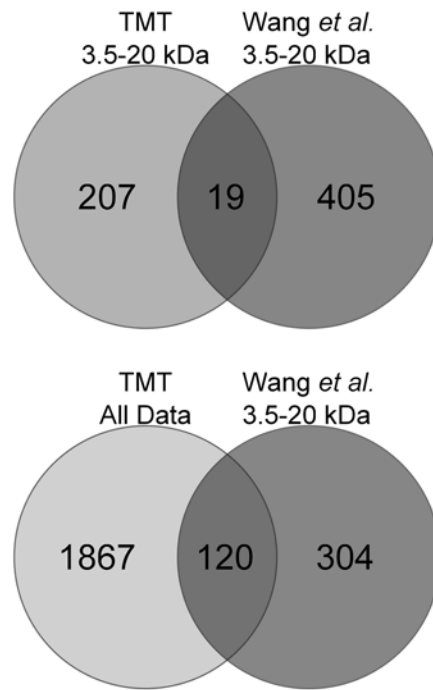

**Figure S2** Comparison between the early anther proteomes with previously-published meiotic-stage small protein proteomes. Venn diagrams illustrating shared and unshared 3.5 – 20 kDa proteins identified in the present proteomes (*TMT*, including 0.4, 0.7, and 1.0 mm anther sizes) and published 1.5 plus 2.0 mm meiotic anther proteomes (*Wang et al.* 2010a). The upper Venn includes only proteins identified in the 3.5 – 20 kDa gel slices for both proteomes; the lower Venn examines proteins from any size class in the current data compared to the 3.5 – 20 kDa from *Wang et al.*
