# Supplementary material for: Transcriptomes and Proteomes Define Gene Expression Progression in Pre-meiotic Maize Anthers
Source: Oxford University Press journal article supplement (doi:10.1534/g3.113.009738), 2014-06-01
Supplement: 993_tables4.pdf [file 993_tables4.pdf]

**Table S4 Quantitative real-time PCR results for 19 genes sampled from the microarray results.**

| Feature Number | MaizeGDB Protein ID | MaizeGDB Protein Name                              | Microarray Expression Pattern |        |        | qRT-PCR Average C(t) |        |        | Pattern Verified |
|----------------|---------------------|----------------------------------------------------|-------------------------------|--------|--------|----------------------|--------|--------|------------------|
|                |                     |                                                    | 0.4 mm                        | 0.7 mm | 1.0 mm | 0.4 mm               | 0.7 mm | 1.0 mm |                  |
| 6513           | N/A                 | N/A                                                | OFF                           | ON     | ON     | 26.7                 | 26.6   | 26.6   | No               |
| 10373          | GRMZM2G113967       | NAF                                                | OFF                           | ON     | ON     | 23.0                 | 22.5   | 23.4   | No               |
| 33683          | GRMZM2G180916       | Protein kinase-like                                | OFF                           | ON     | ON     | 31.2                 | 30.8   | 31.5   | No               |
| 37851          | GRMZM2G166665       | lipopolysaccharide-modifying protein               | OFF                           | ON     | ON     | 28.4                 | 28.5   | 26.9   | No               |
| 44169          | GRMZM2G131715       | N/A                                                | OFF                           | ON     | ON     | 32.7                 | *32.8  | 32.8   | No               |
| 18879          | N/A                 | N/A                                                | OFF                           | ON     | ON     | *28.1                | 25.1   | 23.8   | Yes              |
| 29             | GRMZM2G175761       | Zinc finger, LIM-type                              | OFF                           | ON     | ON     | 21.6                 | 22.3   | 22.5   | No               |
| 24021          | GRMZM2G170457       | hypothetical protein LOC100384355                  | ON                            | ON     | ON     | 21.7                 | 21.2   | 21.3   | Yes              |
| 30914          | GRMZM5G856777       | Photosystem II CP43 chlorophyll apoprotein Precurs | ON                            | ON     | ON     | 19.8                 | 18.7   | 18.6   | Yes              |
| 38273          | GRMZM2G436092       | N/A                                                | ON                            | ON     | ON     | 21.5                 | 21.3   | 21.6   | Yes              |
| 13365          | GRMZM2G170120       | Serine/threonine protein kinase, active site       | ON                            | ON     | ON     | 23.9                 | 23.4   | 23.6   | Yes              |
| 36944          | GRMZM2G095892       | LOC100281279                                       | ON                            | ON     | ON     | 23.2                 | 23.6   | 24.1   | Yes              |
| 5400           | GRMZM2G166524       | Leucine-rich repeat                                | ON                            | ON     | ON     | 22.1                 | 21.3   | 21.1   | Yes              |
| 43905          | GRMZM2G034882       | Tropomyosin                                        | ON                            | ON     | ON     | 26.2                 | 26.0   | 26.2   | Yes              |
| 22801          | GRMZM2G084779       | K+ potassium transporter                           | OFF                           | OFF    | OFF    | 28.8                 | 28.6   | 28.6   | No               |
| 34528          | GRMZM2G130389       | Serine/threonine protein kinase-related            | OFF                           | OFF    | OFF    | **32.3               | 32.5   | 31.8   | Yes              |
| 30365          | GRMZM5G868296       | Putative uncharacterized protein                   | OFF                           | OFF    | OFF    | 30.6                 | 31.1   | 31.1   | Yes              |
| 39100          | GRMZM2G111954       | Aldo/keto reductase                                | OFF                           | OFF    | ON     | **30.1               | *30.1  | 29.8   | No               |
| 36385          | GRMZM2G085872       | CemA                                               | OFF                           | OFF    | ON     | 28.2                 | 28.1   | *28.3  | No               |
| 33573          | GRMZM2G134747       | LOC100284448 (Cyanase)                             | ON                            | ON     | ON     | 22.1                 | 22.0   | 22.2   | Yes              |

| Feature Number | MaizeGDB Protein ID | Forward Primer Sequence | Reverse Primer Sequence |
|----------------|---------------------|-------------------------|-------------------------|
| 6513           | N/A                 | GGCCATGAAACACCAGAAGG    | AGGAAAGGTCACATGCACGA    |
| 10373          | GRMZM2G113967       | GACAGGCTATGATGGGGCAA    | GCTGGGGTCGAGGATCTTG     |
| 33683          | GRMZM2G180916       | AATGTCTCGTGCTTGGCAGA    | AGGCCAGCTTGGATTTGGAT    |
| 37851          | GRMZM2G166665       | TCCCCCTCCCTCTCTCTA      | GCAGGACGGCAGGATACATA    |
| 44169          | GRMZM2G131715       | TGGCCGATCGAGCCTTTTT     | ACGGTGGCAAGAATACAGCA    |
| 18879          | N/A                 | TCTACACCTCCACGCTCGAC    | GTCGCATACAACCACGGTCT    |
| 29             | GRMZM2G175761       | GAGAAGGGCAACTTCAGCC     | TCTGAACGCACATGATCTCC    |
| 24021          | GRMZM2G170457       | CCCCTACTTCGATCTGGACA    | TCTGAATGGAACCTGCTGTG    |
| 30914          | GRMZM5G856777       | TTCGCCAAATTACCGAAG      | ATTCAATTTGGCAGGCAGAA    |

|       |               |                      |                      |
|-------|---------------|----------------------|----------------------|
| 38273 | GRMZM2G436092 | CGCAGTACGAGATTGGATGA | ACAGCACCAAATCCACACC  |
| 13365 | GRMZM2G170120 | AACCCGTCATCATTGTTGG  | TCTGGTCTGTCTTGACAGGC |
| 36944 | GRMZM2G095892 | CCAGTGTCTCAACTCAAGCG | CGGAGATCACGTAGAGGGG  |
| 5400  | GRMZM2G166524 | GGTTCTTGGGTTGGTGTCC  | CCAGATCCATGTTCCCTCC  |
| 43905 | GRMZM2G034882 | ACCGAGGTCCTGAAGATGC  | AATGCATCCAAACGAGGC   |
| 22801 | GRMZM2G084779 | CATAACAGACTGCTCCGGG  | GAACAGAACCCTTCCATTCC |
| 34528 | GRMZM2G130389 | ACATGCATTGAAATTGGGC  | AGCAAATCTCCATGGGTCC  |
| 30365 | GRMZM5G868296 | ACCTACGATTCCCTACCG   | CCCCAAATTTTCTTCCACG  |
| 39100 | GRMZM2G111954 | TCTGAACTGGCTGACCTGC  | CTGCTACGACATGGGTTGG  |
| 36385 | GRMZM2G085872 | AACGAGGAGTGAATTGCTGC | TTTGAAGCTGATGAAGCGG  |
| 33573 | GRMZM2G134747 | GCTGGTGAGGAGGAGAAACA | CAGCAATCATGCCAGGTAGA |

Candidate genes were chosen based on a pattern of expression using OFF or ON at 0.4, 0.7, and 1.0 mm whole anther stages as detailed under “Transcriptome Analysis – Data Analysis” in Materials and Methods. Patterns chosen to verify were: OffOnOn, OnOnOn, OffOffOff, and OffOffOn, relative to 0.4, 0.7, and 1.0 mm. Average  $C_{(T)}$  values are shown using cyanase as an internal reference (Ma et al. 2007). Three biological samples and three technical replicates for each sample were used, except where indicated. Below, primer sequences for the transcripts examined in the qRT-PCR study. \*One biological replicate excluded; \*\*Two biological replicates excluded.
