# Supplementary material for: Transcriptomes and Proteomes Define Gene Expression Progression in Pre-meiotic Maize Anthers
Source: PubMed Central journal article supplement (PMC4065268; doi:10.1534/g3.113.009738), 2014-06-01
Supplement: supp_4.6.993_009738SI.pdf [file supp_4.6.993_009738SI.pdf]

## **Transcriptomes and Proteomes Define Gene Expression Progression in Pre-meiotic Maize Anthers**

Han Zhang\*, Rachel L. Egger\*, Timothy Kelliher\*<sup>1</sup>, Darren Morrow, John Fernandes, Guo-Ling Nan and Virginia Walbot

Department of Biology  
Stanford University, Stanford CA 94305-5020 USA

\*These authors contributed equally to this work.

<sup>1</sup>Current address: Syngenta AG, 3054 E. Cornwallis Rd., Research Triangle Park, NC 27709

Corresponding author contact information

Rachel Egger  
385 Serra Mall, Department of Biology  
Stanford University  
Stanford, CA 94305-5020  
Phone: (650) 723 -2609 Cell Phone: (612) 236-5615 FAX: (650) 725 - 8221  
E-mail: [egger@stanford.edu](mailto:egger@stanford.edu)

GEO records GSE43982 and GSE13118 contain all of the microarray data.

**DOI: 10.1534/g3.113.009738**

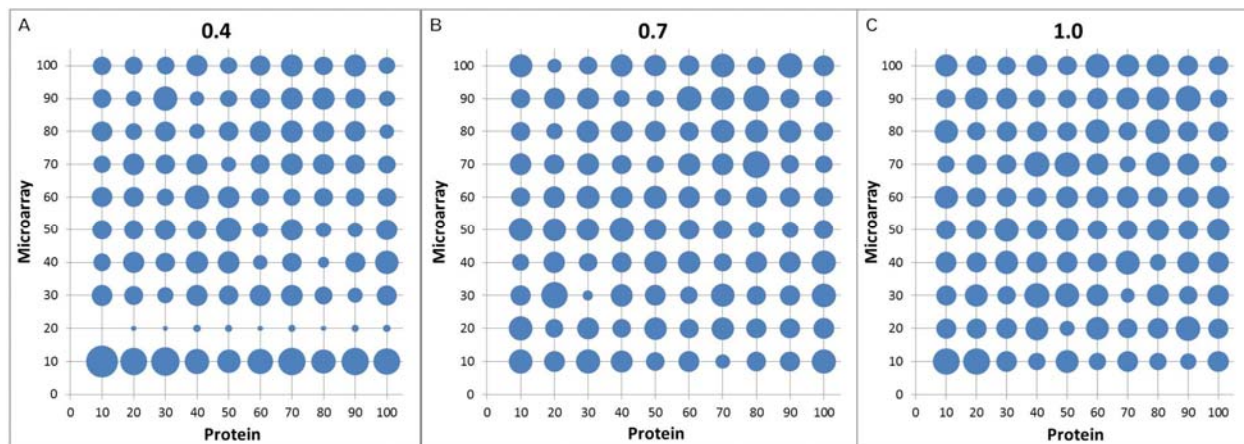

**Figure S1** Decile comparisons of transcriptomes and proteomes at three stages. Comparison of protein and transcript abundances at three developmental stages: 0.4, 0.7, and 1.0 mm. Data were divided into ten bins based on abundance. Circle diameters reflect the number of protein-transcript matches in each of the 100 bins.

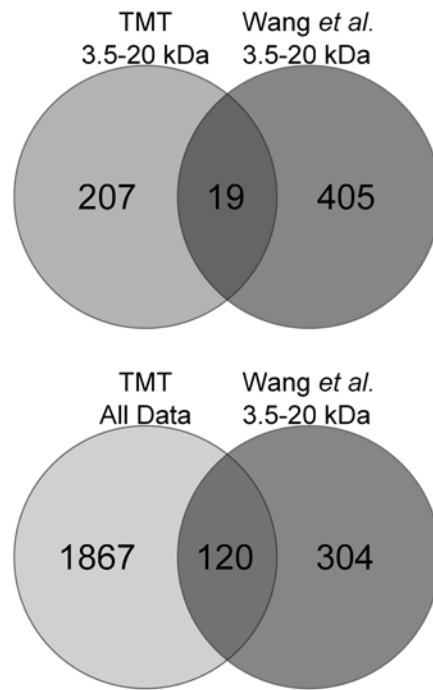

**Figure S2** Comparison between the early anther proteomes with previously-published meiotic-stage small protein proteomes. Venn diagrams illustrating shared and unshared 3.5 – 20 kDa proteins identified in the present proteomes (*TMT*, including 0.4, 0.7, and 1.0 mm anther sizes) and published 1.5 plus 2.0 mm meiotic anther proteomes (*Wang et al.* 2010a). The upper Venn includes only proteins identified in the 3.5 – 20 kDa gel slices for both proteomes; the lower Venn examines proteins from any size class in the current data compared to the 3.5 – 20 kDa from *Wang et al.*

**Table S1 Comparative anther staging in *Arabidopsis thaliana* and *Zea mays*.**

| Arabidopsis          |                    |              | Maize                           |                                       |            |                                 |
|----------------------|--------------------|--------------|---------------------------------|---------------------------------------|------------|---------------------------------|
| Anther stage         | Cell types         |              | Stamen length ( $\mu\text{m}$ ) | Cell types + anther event             | Hours      | Anther length ( $\mu\text{m}$ ) |
| <u>/floral stage</u> | <u>present</u>     | <u>Hours</u> | <u>/anther</u>                  |                                       |            |                                 |
| 1 / 1-5              | L1 L2 L3           | 96           | <10/ no data                    | L1 L2 primordium                      | 96         | 0-120                           |
| 2 / 6                | EPI/AR             | 30           | <20/no data                     | EPI/L2-d/AR                           | 56         | 70-220                          |
|                      |                    |              |                                 | specification                         |            |                                 |
| 3 / 7                | EPI/SPL/AR         | 24           | <50/ no data                    | EPI/EN/SPL/AR                         | 42         | 180-280                         |
|                      |                    |              |                                 | Anticlinal mitotic proliferation      | 36         | 280-550                         |
| 4 / 8                | EPI/EN/ML/TA/AR    | 24           | 55-60/40                        | EPI/EN/ML/TA/AR                       | 24         | 550-700                         |
|                      | Specification done |              |                                 | Specification done                    |            |                                 |
|                      |                    |              |                                 | Anticlinal somatic cell proliferation | 48         | 700-1200                        |
| 5 / 9                | PMC mature         | 60           | 150/120                         | PMC mature                            | 60         | 1000-1500                       |
| 6 / 10               | Prophase 1 meiosis | 12           | 300/240                         | Prophase 1 meiosis                    | 48         | 1500-2000                       |
| Total hours          |                    | <b>246</b>   |                                 |                                       | <b>410</b> |                                 |

Staging information for *A. thaliana* is taken from Smyth *et al.* (1990) and Sanders *et al.* (1999). Maize data are from Kelliher and Walbot (2011, 2012).

## Tables S2-S3

Available for download at <http://www.g3journal.org/lookup/suppl/doi:10.1534/g3.113.009738/-/DC1>

**Table S2 Differential expression of genes across three stages of pre-meiotic anther development.** Transcriptome profiling data comparing global gene expression in whole anthers dissected at three developmental stages: 0.4 mm anther length (4 cell layers including SPL are present), 0.7 mm anther length (just after the birth of the tapetum and middle layer from the SPL), and 1.0 mm anther length (all cell fates are specified and cells are at least partially differentiated; start of the pre-meiotic transition of AR into PMC). Both the raw data (Columns A-BH) and the data after normalization between experiments (Columns BI-CQ) are included in the first tab of the worksheet.

**Table S3 Gene lists included in cluster graphs in Figure 3.** The microarray data were filtered to find transcripts with particular expression patterns over the course of anther development and the most biologically interesting of these patterns are illustrated in the cluster diagrams in Figure 3. The attached file contains the normalized intensity values, feature numbers and gene names of the transcripts included in those graphs in Figure 3, where each tab corresponds to a particular graph presented. The nomenclature exemplified by “OnOnOffOnOn”, denotes the detected presence or absence of those transcripts at particular stages in the following order: 0.15mm, 0.25mm, 0.40mm, 0.70mm and 1.0mm.

**Table S4 Quantitative real-time PCR results for 19 genes sampled from the microarray results.**

| Feature Number | MaizeGDB Protein ID | MaizeGDB Protein Name                              | Microarray Expression Pattern |        |        | qRT-PCR Average C(t) |        |        | Pattern Verified |
|----------------|---------------------|----------------------------------------------------|-------------------------------|--------|--------|----------------------|--------|--------|------------------|
|                |                     |                                                    | 0.4 mm                        | 0.7 mm | 1.0 mm | 0.4 mm               | 0.7 mm | 1.0 mm |                  |
| 6513           | N/A                 | N/A                                                | OFF                           | ON     | ON     | 26.7                 | 26.6   | 26.6   | No               |
| 10373          | GRMZM2G113967       | NAF                                                | OFF                           | ON     | ON     | 23.0                 | 22.5   | 23.4   | No               |
| 33683          | GRMZM2G180916       | Protein kinase-like                                | OFF                           | ON     | ON     | 31.2                 | 30.8   | 31.5   | No               |
| 37851          | GRMZM2G166665       | lipopolysaccharide-modifying protein               | OFF                           | ON     | ON     | 28.4                 | 28.5   | 26.9   | No               |
| 44169          | GRMZM2G131715       | N/A                                                | OFF                           | ON     | ON     | 32.7                 | *32.8  | 32.8   | No               |
| 18879          | N/A                 | N/A                                                | OFF                           | ON     | ON     | *28.1                | 25.1   | 23.8   | Yes              |
| 29             | GRMZM2G175761       | Zinc finger, LIM-type                              | OFF                           | ON     | ON     | 21.6                 | 22.3   | 22.5   | No               |
| 24021          | GRMZM2G170457       | hypothetical protein LOC100384355                  | ON                            | ON     | ON     | 21.7                 | 21.2   | 21.3   | Yes              |
| 30914          | GRMZM5G856777       | Photosystem II CP43 chlorophyll apoprotein Precurs | ON                            | ON     | ON     | 19.8                 | 18.7   | 18.6   | Yes              |
| 38273          | GRMZM2G436092       | N/A                                                | ON                            | ON     | ON     | 21.5                 | 21.3   | 21.6   | Yes              |
| 13365          | GRMZM2G170120       | Serine/threonine protein kinase, active site       | ON                            | ON     | ON     | 23.9                 | 23.4   | 23.6   | Yes              |
| 36944          | GRMZM2G095892       | LOC100281279                                       | ON                            | ON     | ON     | 23.2                 | 23.6   | 24.1   | Yes              |
| 5400           | GRMZM2G166524       | Leucine-rich repeat                                | ON                            | ON     | ON     | 22.1                 | 21.3   | 21.1   | Yes              |
| 43905          | GRMZM2G034882       | Tropomyosin                                        | ON                            | ON     | ON     | 26.2                 | 26.0   | 26.2   | Yes              |
| 22801          | GRMZM2G084779       | K+ potassium transporter                           | OFF                           | OFF    | OFF    | 28.8                 | 28.6   | 28.6   | No               |
| 34528          | GRMZM2G130389       | Serine/threonine protein kinase-related            | OFF                           | OFF    | OFF    | **32.3               | 32.5   | 31.8   | Yes              |
| 30365          | GRMZM5G868296       | Putative uncharacterized protein                   | OFF                           | OFF    | OFF    | 30.6                 | 31.1   | 31.1   | Yes              |
| 39100          | GRMZM2G111954       | Aldo/keto reductase                                | OFF                           | OFF    | ON     | **30.1               | *30.1  | 29.8   | No               |
| 36385          | GRMZM2G085872       | CemA                                               | OFF                           | OFF    | ON     | 28.2                 | 28.1   | *28.3  | No               |
| 33573          | GRMZM2G134747       | LOC100284448 (Cyanase)                             | ON                            | ON     | ON     | 22.1                 | 22.0   | 22.2   | Yes              |

| Feature Number | MaizeGDB Protein ID | Forward Primer Sequence | Reverse Primer Sequence |
|----------------|---------------------|-------------------------|-------------------------|
| 6513           | N/A                 | GGCCATGAAACACCAGAAGG    | AGGAAAGGTCACATGCACGA    |
| 10373          | GRMZM2G113967       | GACAGGCTATGATGGGGCAA    | GCTGGGGTCGAGGATCTTG     |
| 33683          | GRMZM2G180916       | AATGTCTCGTGCTTGGCAGA    | AGGCCAGCTTGGATTTGGAT    |
| 37851          | GRMZM2G166665       | TCCCCCTCCCTCTCTCTA      | GCAGGACGGCAGGATACATA    |
| 44169          | GRMZM2G131715       | TGGCCGATCGAGCCTTTTT     | ACGGTGGCAAGAATACAGCA    |
| 18879          | N/A                 | TCTACACCTCCACGCTCGAC    | GTCGCATACAACCACGGTCT    |
| 29             | GRMZM2G175761       | GAGAAGGGCAACTTCAGCC     | TCTGAACGCACATGATCTCC    |
| 24021          | GRMZM2G170457       | CCCCTACTTCGATCTGGACA    | TCTGAATGGAACCTGCTGTG    |
| 30914          | GRMZM5G856777       | TTCGCCAAATTACCGAAG      | ATTCAATTTGGCAGGCAGAA    |

|       |               |                      |                      |
|-------|---------------|----------------------|----------------------|
| 38273 | GRMZM2G436092 | CGCAGTACGAGATTGGATGA | ACAGCACCAAATCCACACC  |
| 13365 | GRMZM2G170120 | AACCCGTCATCATTGTTGG  | TCTGGTCTGTCTTGACAGGC |
| 36944 | GRMZM2G095892 | CCAGTGTCTCAACTCAAGCG | CGGAGATCACGTAGAGGGG  |
| 5400  | GRMZM2G166524 | GGTTCTTGGGTTGGTGTCC  | CCAGATCCATGTTCCCTCC  |
| 43905 | GRMZM2G034882 | ACCGAGGTCCTGAAGATGC  | AATGCATCCAAACGAGGC   |
| 22801 | GRMZM2G084779 | CATAACAGACTGCTCCGGG  | GAACAGAACCCTTCCATTCC |
| 34528 | GRMZM2G130389 | ACATGCATTGAAATTGGGC  | AGCAAATCTCCATGGGTCC  |
| 30365 | GRMZM5G868296 | ACCTACGATTCCCTACCG   | CCCCAAATTTTCTTCCACG  |
| 39100 | GRMZM2G111954 | TCTGAACTGGCTGACCTGC  | CTGCTACGACATGGGTTGG  |
| 36385 | GRMZM2G085872 | AACGAGGAGTGAATTGCTGC | TTTGAAGCTGATGAAGCGG  |
| 33573 | GRMZM2G134747 | GCTGGTGAGGAGGAGAAACA | CAGCAATCATGCCAGGTAGA |

Candidate genes were chosen based on a pattern of expression using OFF or ON at 0.4, 0.7, and 1.0 mm whole anther stages as detailed under “Transcriptome Analysis – Data Analysis” in Materials and Methods. Patterns chosen to verify were: OffOnOn, OnOnOn, OffOffOff, and OffOffOn, relative to 0.4, 0.7, and 1.0 mm. Average  $C_{(T)}$  values are shown using cyanase as an internal reference (Ma et al. 2007). Three biological samples and three technical replicates for each sample were used, except where indicated. Below, primer sequences for the transcripts examined in the qRT-PCR study. \*One biological replicate excluded; \*\*Two biological replicates excluded.

**Table S5 Average intensities of hormone-related pathways.**

| Pathways                          | 0.15 mm | 0.25 mm | 0.4 mm | 0.7 mm | 1.0 mm |
|-----------------------------------|---------|---------|--------|--------|--------|
| <b>jasmonic acid biosynthesis</b> |         |         |        |        |        |
| GRMZM2G002959                     | 554.4   | 633.2   | 657.8  | 778.4  | 1323.3 |
| GRMZM2G009479                     | 244.1   | 303.1   | 300.6  | 333.5  | 298.2  |
| GRMZM2G014136                     | 152.5   | 142.7   | 140.7  | 104.9  | 175.5  |
| GRMZM2G015419                     | 108.5   | 91.5    | 83.3   | 114.4  | 113.1  |
| GRMZM2G033491                     | 290.2   | 244.3   | 218.9  | 397.5  | 352.7  |
| GRMZM2G052389                     | 267.5   | 183.6   | 137.7  | 172.4  | 177.3  |
| GRMZM2G072653 <sup>a</sup>        | 608.7   | 548.6   | 607.2  | 496.7  | 2133.3 |
| GRMZM2G077316 <sup>a,b</sup>      | 1044.6  | 1204.2  | 1328.3 | 1646.8 | 3669.4 |
| GRMZM2G082087                     | 142     | 145.7   | 149.1  | 161.7  | 270.1  |
| GRMZM2G087192 <sup>a</sup>        | 122.2   | 281.7   | 214.6  | 187.1  | 457.6  |
| GRMZM2G102760                     | 89.8    | 87.1    | 78.3   | 86.9   | 76.2   |
| GRMZM2G104843                     | 94.4    | 104.9   | 99.7   | 90.6   | 84.3   |
| GRMZM2G106250                     | 87      | 84.6    | 87.2   | 97.9   | 129.4  |
| GRMZM2G109056 <sup>a</sup>        | 4517    | 4803.9  | 4290.5 | 4761   | 2369.7 |
| GRMZM2G109130 <sup>a</sup>        | 1303.8  | 764.7   | 386.6  | 379.6  | 1768.2 |
| GRMZM2G110201 <sup>a,b</sup>      | 1409.9  | 1317.7  | 1390.3 | 1891.3 | 845.2  |
| GRMZM2G117357                     | 312.4   | 248     | 204.1  | 222.2  | 203.2  |
| GRMZM2G132903 <sup>a,b</sup>      | 508     | 531.1   | 549.5  | 423.2  | 1741.4 |
| GRMZM2G146885                     | 879.3   | 945.2   | 1017.6 | 646    | 998.2  |
| GRMZM2G148281                     | 1458.8  | 1271.5  | 1320   | 1378.5 | 1407.8 |
| GRMZM2G151087 <sup>a</sup>        | 3503.3  | 3650    | 3714.4 | 2928.4 | 8280.9 |
| GRMZM2G156712 <sup>a</sup>        | 143.4   | 161.7   | 165.6  | 111.4  | 230.1  |
| GRMZM2G156861 <sup>a</sup>        | 1133.5  | 432.6   | 199    | 112.5  | 3820.4 |
| GRMZM2G168404                     | 171.1   | 153.1   | 154.5  | 143.5  | 85.6   |
| GRMZM2G398500                     | 333.2   | 312.8   | 393.7  | 237.2  | 273.7  |
| GRMZM2G415793                     | 3569.9  | 3047.6  | 3782.3 | 7002.8 | 5972   |
| GRMZM2G459755                     | 84.9    | 92.7    | 98.2   | 90.9   | 72.3   |
| GRMZM5G862219 <sup>a</sup>        | 2417.9  | 2288.7  | 2159.6 | 2941.8 | 497.3  |
| GRMZM5G864319 <sup>b</sup>        | 1252.7  | 1061.9  | 1092   | 1407.4 | 546    |
| <b>IAA biosynthesis I</b>         |         |         |        |        |        |
| GRMZM2G022192                     | 123.9   | 115.2   | 113.2  | 128.2  | 93.7   |
| GRMZM2G066345                     | 122.6   | 148.1   | 153    | 87.7   | 139.8  |



|                                                                       |        |        |        |        |        |
|-----------------------------------------------------------------------|--------|--------|--------|--------|--------|
| GRMZM2G111225                                                         | 175.2  | 151    | 139.7  | 197.4  | 111.9  |
| GRMZM2G111309 <sup>a</sup>                                            | 181.9  | 174.4  | 170.6  | 109    | 224.3  |
| GRMZM2G117614 <sup>a</sup>                                            | 348.1  | 304.2  | 320.4  | 290.3  | 690.4  |
| GRMZM2G124175                                                         | 93.4   | 106.7  | 108.1  | 115.1  | 95.6   |
| GRMZM2G141473 <sup>a</sup>                                            | 72.9   | 77     | 102.7  | 765.2  | 179.9  |
| GRMZM2G141535 <sup>a</sup>                                            | 297.9  | 598.2  | 750.8  | 1532.8 | 1941.3 |
| GRMZM2G159542                                                         | 230.9  | 223.2  | 205.9  | 267.1  | 137    |
| GRMZM2G169087                                                         | 95.1   | 94.4   | 81.5   | 112.2  | 118    |
| GRMZM2G178517                                                         | 152.8  | 143.6  | 142.4  | 159.9  | 147.8  |
| GRMZM5G875732                                                         | 83.4   | 88.2   | 89.3   | 88.7   | 173.4  |
| <b>methyl indole-3-acetate interconversion</b>                        |        |        |        |        |        |
| GRMZM2G022934 <sup>a</sup>                                            | 3346.1 | 1403.8 | 500    | 101.6  | 8799.2 |
| GRMZM2G046558 <sup>b</sup>                                            | 4329.6 | 5738.9 | 5099.6 | 5581.9 | 4592.7 |
| GRMZM2G060732                                                         | 117.1  | 111.2  | 109.8  | 91.3   | 154.4  |
| GRMZM2G060760                                                         | 101.3  | 114.2  | 96     | 102    | 118.1  |
| GRMZM2G085402 <sup>a</sup>                                            | 476.1  | 355.3  | 295.7  | 305.2  | 649.7  |
| GRMZM2G085939                                                         | 108.9  | 101.1  | 104.6  | 102.9  | 82.5   |
| GRMZM2G100716                                                         | 254.4  | 318.9  | 388.6  | 419.9  | 774.5  |
| GRMZM2G168299                                                         | 996.6  | 959.4  | 1012.3 | 1334.8 | 1159.5 |
| GRMZM2G174315 <sup>a</sup>                                            | 377.1  | 501    | 380    | 959    | 826    |
| <b>GA12 biosynthesis</b>                                              |        |        |        |        |        |
| GRMZM2G059308 <sup>a</sup>                                            | 1993.6 | 3027   | 2477   | 1028.6 | 838.8  |
| GRMZM2G093195 <sup>a</sup>                                            | 95.7   | 220.5  | 336    | 216.7  | 72.3   |
| <b>gibberellin inactivation I (2<math>\beta</math>-hydroxylation)</b> |        |        |        |        |        |
| GRMZM2G022679 <sup>a</sup>                                            | 542.5  | 289.3  | 217.8  | 377.8  | 1122.9 |
| GRMZM2G051619 <sup>a</sup>                                            | 1610.7 | 721    | 685.9  | 614.3  | 1998.2 |
| GRMZM2G078798                                                         | 84.5   | 88.4   | 98.3   | 79     | 80.4   |
| GRMZM2G121700 <sup>b</sup>                                            | 94.8   | 100.5  | 98.7   | 104.1  | 152    |
| GRMZM2G147882                                                         | 362.1  | 406.4  | 548.9  | 1087.1 | 546.3  |
| GRMZM2G155686 <sup>a</sup>                                            | 247.3  | 127.4  | 108.3  | 111.1  | 234    |
| GRMZM2G427618                                                         | 76.5   | 77.9   | 79.1   | 76.7   | 120.6  |
| <b>brassinosteroid biosynthesis II</b>                                |        |        |        |        |        |
| GRMZM2G009681                                                         | 119.5  | 106.3  | 96.5   | 132.7  | 106.2  |
| GRMZM2G017678                                                         | 162    | 148.7  | 137.8  | 178.2  | 209.4  |
| GRMZM2G031169                                                         | 75.8   | 79.9   | 88     | 141.4  | 194.9  |
| GRMZM2G031311                                                         | 138.9  | 135.5  | 132.1  | 161    | 140    |

|                              |        |        |        |         |         |
|------------------------------|--------|--------|--------|---------|---------|
| GRMZM2G033555                | 5652.9 | 7145.3 | 9292.1 | 11727.9 | 12421.3 |
| GRMZM2G034069                | 1790.1 | 1910.1 | 1863.1 | 1169.4  | 1149.5  |
| GRMZM2G040397 <sup>a</sup>   | 611.8  | 739.9  | 756    | 635.6   | 1318.3  |
| GRMZM2G042179                | 159.8  | 156.6  | 139.3  | 164.4   | 200.8   |
| GRMZM2G044027 <sup>b</sup>   | 253.5  | 193.8  | 175.1  | 234.7   | 309     |
| GRMZM2G044281                | 144    | 162.4  | 127.9  | 158.2   | 90.1    |
| GRMZM2G052336 <sup>a,b</sup> | 73.4   | 119.2  | 295.7  | 1083.6  | 428.3   |
| GRMZM2G052357                | 785.4  | 872.1  | 739.9  | 608.3   | 1082.1  |
| GRMZM2G057328                | 1517.3 | 1194.5 | 1276.5 | 1203.5  | 1473.6  |
| GRMZM2G068917                | 628.2  | 409.3  | 454.2  | 303.9   | 338     |
| GRMZM2G069708                | 271.6  | 281.6  | 367.3  | 427.1   | 409.7   |
| GRMZM2G077531                | 194.1  | 193.2  | 231.8  | 269.9   | 226.5   |
| GRMZM2G107076 <sup>a</sup>   | 91.7   | 156.5  | 387.5  | 995.7   | 1725.4  |
| GRMZM2G108570 <sup>a</sup>   | 392.8  | 392.5  | 443.6  | 327.5   | 919.4   |
| GRMZM2G109589 <sup>a</sup>   | 145.6  | 116.4  | 107.1  | 183     | 84.3    |
| GRMZM2G110558                | 626    | 674.4  | 592.1  | 1096.5  | 2054.7  |
| GRMZM2G110881                | 114.5  | 119.8  | 150.8  | 212.2   | 127.1   |
| GRMZM2G123652                | 247.9  | 256.7  | 279.4  | 357.3   | 671.9   |
| GRMZM2G124434                | 395.3  | 244.4  | 209.8  | 300.6   | 565.5   |
| GRMZM2G138410                | 173    | 199.7  | 245.1  | 192.8   | 257     |
| GRMZM2G138907                | 176.3  | 143.7  | 135.4  | 169.7   | 117.6   |
| GRMZM2G143235                | 197.4  | 112.7  | 133.8  | 137.9   | 182.8   |
| GRMZM2G145460                | 139.7  | 150.9  | 150.9  | 142.1   | 106.9   |
| GRMZM2G149224                | 199.5  | 206.9  | 179.7  | 145.9   | 74      |
| GRMZM2G150541                | 337.1  | 289.3  | 314.3  | 398.7   | 389.9   |
| GRMZM2G154532 <sup>b</sup>   | 627.5  | 678.9  | 881.2  | 1288    | 972.3   |
| GRMZM2G165357                | 158.3  | 145.3  | 144.3  | 141     | 228.4   |
| GRMZM2G166767                | 1599.7 | 1861.6 | 2168.4 | 1973.7  | 2413.5  |
| GRMZM2G170336                | 8180.9 | 9132.8 | 8184.9 | 6000.7  | 5626.6  |
| GRMZM2G170812                | 333.4  | 353.5  | 649.3  | 851     | 513     |
| GRMZM2G171662                | 1166.7 | 1204.3 | 1225.6 | 1377.2  | 1253.1  |
| GRMZM2G179685                | 107.1  | 130.8  | 209.7  | 173.2   | 345.4   |
| GRMZM2G179981                | 554    | 347.5  | 275.7  | 365.4   | 221.4   |
| GRMZM2G180922                | 631.2  | 614.8  | 661.4  | 652     | 1031.7  |
| GRMZM2G300412                | 135.7  | 104.1  | 92.3   | 96.8    | 164.2   |
| GRMZM2G347717                | 146.6  | 134.7  | 143.8  | 205     | 317.7   |

|                                            |        |        |        |        |        |
|--------------------------------------------|--------|--------|--------|--------|--------|
| GRMZM2G370048                              | 135.1  | 162.7  | 158.5  | 152.1  | 300    |
| GRMZM2G381473 <sup>a</sup>                 | 364.8  | 413    | 498.8  | 854.3  | 306.2  |
| GRMZM2G468439 <sup>a</sup>                 | 199.1  | 147.7  | 156.3  | 189.9  | 824.1  |
| GRMZM2G469523                              | 2872.9 | 2978.7 | 3426.9 | 3411.9 | 4367.2 |
| <b>abscisic acid biosynthesis</b>          |        |        |        |        |        |
| GRMZM2G124175                              | 93.4   | 106.7  | 108.1  | 115.1  | 95.6   |
| GRMZM2G141473 <sup>a</sup>                 | 72.9   | 77     | 102.7  | 765.2  | 179.9  |
| GRMZM2G141535 <sup>a</sup>                 | 297.9  | 598.2  | 750.8  | 1532.8 | 1941.3 |
| GRMZM2G446858                              | 80.9   | 83.9   | 84.5   | 78.9   | 129.9  |
| <b>cytokinins-O-glucoside biosynthesis</b> |        |        |        |        |        |
| GRMZM2G004858 <sup>a</sup>                 | 90.2   | 92.9   | 85.3   | 385.6  | 72.1   |
| GRMZM2G022101                              | 167.3  | 106.2  | 104.4  | 99.8   | 137.7  |
| GRMZM2G022242                              | 314.7  | 357.2  | 421.3  | 277    | 358.8  |
| GRMZM2G031138                              | 92.1   | 123.5  | 149.7  | 131.6  | 126.3  |
| GRMZM2G036409                              | 134.2  | 104.4  | 93.8   | 117    | 115.1  |
| GRMZM2G041699 <sup>a</sup>                 | 135.9  | 122.4  | 87.1   | 120.7  | 390.2  |
| GRMZM2G043295                              | 288    | 259.7  | 248.8  | 254.9  | 225    |
| GRMZM2G058314                              | 438.4  | 434.5  | 475.8  | 439    | 555.6  |
| GRMZM2G061321                              | 76.2   | 108.5  | 126.4  | 95.8   | 71.1   |
| GRMZM2G063042                              | 113.6  | 104.9  | 106    | 136.3  | 89.7   |
| GRMZM2G073376                              | 182.5  | 169.6  | 186.8  | 235.2  | 214.9  |
| GRMZM2G082249 <sup>a</sup>                 | 158    | 196.7  | 239.3  | 297.3  | 673.8  |
| GRMZM2G083935                              | 72.3   | 90.9   | 121.9  | 95     | 65.2   |
| GRMZM2G085054                              | 706.3  | 548.5  | 396.1  | 409.7  | 767.4  |
| GRMZM2G095280                              | 440.5  | 299.1  | 254.1  | 227.1  | 260.5  |
| GRMZM2G096412                              | 72     | 87.1   | 134.2  | 82.4   | 134.2  |
| GRMZM2G098667                              | 414.4  | 359.1  | 352.8  | 314.6  | 320.3  |
| GRMZM2G113794 <sup>a</sup>                 | 350.8  | 537.8  | 542.5  | 476.1  | 981.7  |
| GRMZM2G118657                              | 68.5   | 71.9   | 84.2   | 73.4   | 70.6   |
| GRMZM2G122072                              | 136.6  | 149.7  | 119.5  | 121.8  | 136    |
| GRMZM2G142873 <sup>b</sup>                 | 196.5  | 224.8  | 239    | 200.3  | 188.9  |
| GRMZM2G156127                              | 179.1  | 212.9  | 359.2  | 239    | 163.4  |
| GRMZM2G159404                              | 215.6  | 196.7  | 203.7  | 244.9  | 295    |
| GRMZM2G160452                              | 207.8  | 277.9  | 257.8  | 294.2  | 215    |
| GRMZM2G160523 <sup>a</sup>                 | 94.3   | 95.2   | 91.6   | 102.9  | 586.6  |
| GRMZM2G161335                              | 729.9  | 721.3  | 777.7  | 975.9  | 747.1  |

|                                              |         |         |         |         |        |
|----------------------------------------------|---------|---------|---------|---------|--------|
| GRMZM2G165390 <sup>a</sup>                   | 447.9   | 390.9   | 412.5   | 776.8   | 3421.3 |
| GRMZM2G173926                                | 66.9    | 72.9    | 82.4    | 64.2    | 71.8   |
| GRMZM2G304712                                | 148.2   | 178.7   | 194.6   | 170.6   | 206.9  |
| GRMZM2G363554 <sup>a</sup>                   | 853.8   | 690.2   | 792.1   | 337.2   | 170.7  |
| GRMZM2G426415                                | 84.6    | 120     | 132.7   | 174.2   | 153    |
| GRMZM2G440902                                | 87.6    | 94.9    | 110.6   | 104.8   | 78.2   |
| GRMZM5G832805                                | 74.8    | 78      | 93.4    | 133.5   | 152.1  |
| <b>cytokinins degradation</b>                |         |         |         |         |        |
| GRMZM2G146644 <sup>a</sup>                   | 1502.9  | 1596.9  | 1706.3  | 846.6   | 420.2  |
| GRMZM2G167220                                | 103     | 105.8   | 113.9   | 101.6   | 121.3  |
| GRMZM2G348452 <sup>a</sup>                   | 1039.1  | 1353.8  | 1170.6  | 429.5   | 618.8  |
| GRMZM5G817173 <sup>a</sup>                   | 489.1   | 897.5   | 1297    | 572.2   | 1263.4 |
| <b>ethylene biosynthesis from methionine</b> |         |         |         |         |        |
| GRMZM2G006480 <sup>a</sup>                   | 69.5    | 122.2   | 237     | 126     | 252.7  |
| GRMZM2G013448                                | 265.2   | 215.4   | 137.5   | 270     | 393.8  |
| GRMZM2G018006                                | 145     | 138.6   | 138.7   | 107.8   | 68.6   |
| GRMZM2G026131                                | 137.8   | 132.4   | 140.8   | 152.7   | 168.8  |
| GRMZM2G029135 <sup>a</sup>                   | 360.5   | 422.5   | 554.8   | 824.5   | 108.7  |
| GRMZM2G033799 <sup>b</sup>                   | 1165.8  | 946.2   | 919.1   | 859.9   | 1077.1 |
| GRMZM2G053999 <sup>b</sup>                   | 3028.9  | 3931.2  | 3965.8  | 3922.1  | 2975.5 |
| GRMZM2G054361 <sup>a</sup>                   | 305.3   | 347.1   | 215.2   | 334.8   | 1066.7 |
| GRMZM2G067265 <sup>b</sup>                   | 1161.5  | 1202.3  | 1052.5  | 1325    | 1949.1 |
| GRMZM2G088064 <sup>a,b</sup>                 | 4767.7  | 6458.7  | 9210.4  | 12133.4 | 3546.9 |
| GRMZM2G094712 <sup>b</sup>                   | 95.6    | 105.2   | 105.5   | 158.3   | 84.5   |
| GRMZM2G107639 <sup>a,b</sup>                 | 457.1   | 652     | 1155.1  | 1384    | 692.4  |
| GRMZM2G117198 <sup>a,b</sup>                 | 16000.8 | 18729.9 | 18788.1 | 23193.1 | 9959.9 |
| GRMZM2G117230                                | 70.4    | 75.1    | 72.4    | 78.2    | 155    |
| GRMZM2G120302                                | 99.5    | 103.6   | 109.4   | 123.5   | 128.8  |
| GRMZM2G120563 <sup>b</sup>                   | 4605.6  | 5819.6  | 7347.5  | 4568.4  | 1953.1 |
| GRMZM2G126732 <sup>a</sup>                   | 142.2   | 241.9   | 234.4   | 211.8   | 1136.2 |
| GRMZM2G164405                                | 90.4    | 96.1    | 113     | 130     | 227.3  |
| GRMZM2G170595 <sup>a</sup>                   | 234.6   | 212.9   | 180.4   | 242.9   | 92     |
| GRMZM2G174145 <sup>a</sup>                   | 747.7   | 949.4   | 744.6   | 869     | 409.3  |
| GRMZM2G400604                                | 158.5   | 198.7   | 163.2   | 88.2    | 94.8   |
| GRMZM2G455945                                | 245.1   | 235.5   | 227.3   | 301.5   | 400.7  |
| GRMZM5G828630                                | 137.8   | 148.5   | 130     | 187.9   | 134.7  |

GRMZM5G840582

236.6

244.9

329.3

172.2

135.4

---

The average intensities from the array experiments for all the constitutively expressed transcripts belonging to the hormone-associated pathways with at least one transcript meeting the two-fold cutoff as highlighted by Pathway Tools Omics Viewer (<http://pathway.gemene.org/MAIZE/expression.html>).

<sup>a</sup> Genes with two-fold difference between at least two stages.

<sup>b</sup> The protein was detected in the mass spectrometry data.

**Table S6 Microarray intensities for transcription factor transcripts that exhibit differential accumulation during anther development.**

| <b>Transcription factors scored as increased expression</b> |             |        |                                               |
|-------------------------------------------------------------|-------------|--------|-----------------------------------------------|
| Gene ID                                                     | Family      | Stage  | Relative intensity compared to previous stage |
| GRMZM2G151689                                               | C3H         | 0.25mm | TURN ON                                       |
| GRMZM2G124037                                               | ERF         | 0.25mm | 2.797966102                                   |
| GRMZM2G069082                                               | ERF         | 0.25mm | 2.739469579                                   |
| GRMZM2G139372                                               | bHLH        | 0.25mm | 2.435033259                                   |
| GRMZM2G162481                                               | WOX         | 0.25mm | 2.379084967                                   |
| GRMZM2G006578                                               | bZIP        | 0.25mm | 2.326327158                                   |
| GRMZM2G113779                                               | SBP         | 0.25mm | 2.219683695                                   |
| GRMZM2G069146                                               | ERF         | 0.25mm | 2.057844691                                   |
| GRMZM2G137046                                               | bZIP        | 0.40mm | TURN ON                                       |
| GRMZM2G099522                                               | MIKC        | 0.4mm  | 6.059807516                                   |
| GRMZM2G095299                                               | DBB         | 0.4mm  | 3.143856921                                   |
| GRMZM2G102161                                               | MIKC        | 0.4mm  | 2.828297362                                   |
| GRMZM2G095598                                               | CO-like     | 0.4mm  | 2.573320719                                   |
| GRMZM2G171942                                               | C3H         | 0.4mm  | 2.013937282                                   |
| GRMZM2G030458                                               | GeBP        | 0.7mm  | TURN ON                                       |
| GRMZM2G031120                                               | NAC         | 0.7mm  | TURN ON                                       |
| GRMZM2G171468                                               | G2-like     | 0.7mm  | TURN ON                                       |
| GRMZM2G126018                                               | SBP         | 0.7mm  | TURN ON                                       |
| GRMZM2G124540                                               | G2-like     | 0.7mm  | TURN ON                                       |
| GRMZM2G097349                                               | HD-ZIP      | 0.7mm  | TURN ON                                       |
| GRMZM2G065896                                               | GATA        | 0.7mm  | TURN ON                                       |
| GRMZM2G018876                                               | DBB         | 0.7mm  | TURN ON                                       |
| GRMZM2G075562                                               | CO-like     | 0.7mm  | TURN ON                                       |
| GRMZM2G108933                                               | WOX         | 0.7mm  | TURN ON                                       |
| GRMZM2G098557                                               | SBP         | 0.7mm  | TURN ON                                       |
| GRMZM2G447551                                               | CAMTA       | 0.7mm  | TURN ON                                       |
| GRMZM2G102218                                               | YABBY       | 0.7mm  | 3.52274377                                    |
| GRMZM2G048450                                               | WRKY        | 0.7mm  | 2.69488189                                    |
| GRMZM5G839518                                               | bHLH        | 0.7mm  | 2.604166667                                   |
| GRMZM2G171942                                               | C3H         | 0.7mm  | 2.53183391                                    |
| GRMZM2G173882                                               | G2-like     | 0.7mm  | 2.42605364                                    |
| GRMZM2G147346                                               | MYB         | 0.7mm  | 2.337253961                                   |
| GRMZM2G019446                                               | bZIP        | 0.7mm  | 2.280073462                                   |
| GRMZM2G384528                                               | NF-YB       | 0.7mm  | 2.262172285                                   |
| GRMZM2G088524                                               | MYB_related | 0.7mm  | 2.250614251                                   |
| GRMZM2G312201                                               | NAC         | 0.7mm  | 2.2395771                                     |
| GRMZM2G139688                                               | MYB         | 0.7mm  | 2.193548387                                   |
| GRMZM2G006745                                               | ERF         | 0.7mm  | 2.186853767                                   |
| GRMZM2G080509                                               | GATA        | 0.7mm  | 2.145267545                                   |
| GRMZM2G129147                                               | GRF         | 0.7mm  | 2.118106433                                   |
| GRMZM2G156016                                               | VOZ         | 0.7mm  | 2.085276482                                   |
| GRMZM2G169270                                               | SBP         | 0.7mm  | 2.084667378                                   |
| GRMZM2G067743                                               | GRF         | 0.7mm  | 2.073722785                                   |

|               |             |       |             |
|---------------|-------------|-------|-------------|
| GRMZM2G139688 | MYB         | 0.7mm | 2.030612245 |
| GRMZM2G103315 | Trihelix    | 0.7mm | 2.021681416 |
| GRMZM2G067702 | G2-like     | 0.7mm | 2.014676716 |
| GRMZM2G119823 | bHLH        | 1.0mm | TURN ON     |
| GRMZM2G136887 | MYB_related | 1.0mm | TURN ON     |
| GRMZM2G109509 | Nin-like    | 1.0mm | TURN ON     |
| GRMZM2G154029 | bHLH        | 1.0mm | TURN ON     |
| GRMZM2G021339 | HD-ZIP      | 1.0mm | TURN ON     |
| GRMZM2G037910 | bZIP        | 1.0mm | TURN ON     |
| GRMZM2G463730 | FAR1        | 1.0mm | TURN ON     |
| GRMZM2G167829 | MYB         | 1.0mm | TURN ON     |
| GRMZM2G371058 | Dof         | 1.0mm | TURN ON     |
| GRMZM2G123667 | NAC         | 1.0mm | TURN ON     |
| GRMZM2G159119 | G2-like     | 1.0mm | TURN ON     |
| GRMZM2G173372 | bHLH        | 1.0mm | TURN ON     |
| GRMZM2G105387 | M-type      | 1.0mm | TURN ON     |
| GRMZM2G042101 | bHLH        | 1.0mm | TURN ON     |
| GRMZM2G445575 | bZIP        | 1.0mm | TURN ON     |
| GRMZM2G005353 | YABBY       | 1.0mm | TURN ON     |
| GRMZM2G139284 | MYB         | 1.0mm | TURN ON     |
| GRMZM2G114688 | C3H         | 1.0mm | TURN ON     |
| GRMZM2G099319 | TALE        | 1.0mm | TURN ON     |
| GRMZM2G016649 | Trihelix    | 1.0mm | TURN ON     |
| GRMZM2G079632 | NAC         | 1.0mm | TURN ON     |
| GRMZM2G044408 | M-type      | 1.0mm | TURN ON     |
| GRMZM2G150680 | MYB         | 1.0mm | TURN ON     |
| GRMZM2G439903 | NAC         | 1.0mm | TURN ON     |
| GRMZM2G380377 | ERF         | 1.0mm | TURN ON     |
| GRMZM2G092137 | bZIP        | 1.0mm | TURN ON     |
| GRMZM2G111731 | MYB         | 1.0mm | 26.65572391 |
| GRMZM2G098696 | HSF         | 1.0mm | 9.914179104 |
| GRMZM2G072582 | MIKC        | 1.0mm | 7.677824268 |
| GRMZM5G874163 | ARF         | 1.0mm | 6.92749658  |
| GRMZM2G449681 | WRKY        | 1.0mm | 6.849389987 |
| GRMZM2G139963 | HD-ZIP      | 1.0mm | 6.807491702 |
| GRMZM2G120320 | WRKY        | 1.0mm | 6.524705435 |
| GRMZM2G384339 | HSF         | 1.0mm | 6.482216708 |
| GRMZM2G125653 | WRKY        | 1.0mm | 5.978388998 |
| GRMZM2G353076 | ZF-HD       | 1.0mm | 5.799773756 |
| GRMZM2G134279 | MYB         | 1.0mm | 5.663985702 |
| GRMZM2G171781 | MYB         | 1.0mm | 5.424817518 |
| GRMZM2G079185 | LBD         | 1.0mm | 5.332498748 |
| GRMZM2G394941 | Dof         | 1.0mm | 5.094233999 |
| GRMZM5G828396 | bHLH        | 1.0mm | 4.849272349 |
| GRMZM2G170049 | MYB         | 1.0mm | 4.842062853 |
| GRMZM2G113060 | ERF         | 1.0mm | 4.657912016 |
| GRMZM2G088524 | MYB_related | 1.0mm | 4.622543668 |
| GRMZM2G091201 | MYB_related | 1.0mm | 4.203002611 |
| GRMZM2G012724 | WRKY        | 1.0mm | 4.091583971 |

|               |             |       |             |
|---------------|-------------|-------|-------------|
| GRMZM2G104078 | NAC         | 1.0mm | 4.086577181 |
| GRMZM2G324999 | WRKY        | 1.0mm | 3.989321789 |
| GRMZM2G001223 | MYB_related | 1.0mm | 3.969014085 |
| GRMZM2G428184 | bZIP        | 1.0mm | 3.958141909 |
| GRMZM2G375307 | Trihelix    | 1.0mm | 3.94591029  |
| GRMZM2G001048 | B3          | 1.0mm | 3.911111111 |
| GRMZM2G159500 | NAC         | 1.0mm | 3.910761155 |
| GRMZM2G158328 | WRKY        | 1.0mm | 3.819941917 |
| GRMZM2G106204 | YABBY       | 1.0mm | 3.774496644 |
| GRMZM2G102583 | WRKY        | 1.0mm | 3.77252907  |
| GRMZM2G014653 | NAC         | 1.0mm | 3.763888889 |
| GRMZM2G148693 | MIKC        | 1.0mm | 3.758303887 |
| GRMZM2G003466 | ERF         | 1.0mm | 3.678592375 |
| GRMZM2G132367 | HD-ZIP      | 1.0mm | 3.661455201 |
| GRMZM2G056600 | HD-ZIP      | 1.0mm | 3.66068168  |
| GRMZM2G035405 | ARF         | 1.0mm | 3.645961077 |
| GRMZM2G529859 | YABBY       | 1.0mm | 3.484215142 |
| GRMZM2G171781 | MYB         | 1.0mm | 3.478658537 |
| GRMZM2G060918 | WRKY        | 1.0mm | 3.470039947 |
| GRMZM2G149347 | C3H         | 1.0mm | 3.45785877  |
| GRMZM2G134073 | NAC         | 1.0mm | 3.411278195 |
| GRMZM2G061408 | WRKY        | 1.0mm | 3.377542549 |
| GRMZM2G301089 | bHLH        | 1.0mm | 3.372400756 |
| GRMZM2G173862 | bHLH        | 1.0mm | 3.341553637 |
| GRMZM2G024973 | GRAS        | 1.0mm | 3.333010492 |
| GRMZM2G379005 | GATA        | 1.0mm | 3.322447292 |
| GRMZM2G017087 | TALE        | 1.0mm | 3.317948718 |
| GRMZM2G110582 | M-type      | 1.0mm | 3.301038062 |
| GRMZM2G115070 | MYB_related | 1.0mm | 3.270484981 |
| GRMZM2G005624 | HD-ZIP      | 1.0mm | 3.254452926 |
| GRMZM2G173882 | G2-like     | 1.0mm | 3.225521162 |
| GRMZM2G160971 | ERF         | 1.0mm | 3.216624685 |
| GRMZM2G157197 | C2H2        | 1.0mm | 3.201649175 |
| GRMZM2G155662 | Whirly      | 1.0mm | 3.167141747 |
| GRMZM2G068973 | NAC         | 1.0mm | 3.142911153 |
| GRMZM2G020805 | TCP         | 1.0mm | 3.111872146 |
| GRMZM2G097349 | HD-ZIP      | 1.0mm | 3.110945644 |
| GRMZM2G314546 | HB-PHD      | 1.0mm | 3.06959136  |
| GRMZM2G094892 | bHLH        | 1.0mm | 3.041726619 |
| GRMZM2G160565 | MIKC        | 1.0mm | 2.998381877 |
| GRMZM2G117193 | G2-like     | 1.0mm | 2.972972973 |
| GRMZM2G125596 | B3          | 1.0mm | 2.966811414 |
| GRMZM2G017606 | SRS         | 1.0mm | 2.946017699 |
| GRMZM2G148074 | HD-ZIP      | 1.0mm | 2.902867174 |
| GRMZM2G083886 | GeBP        | 1.0mm | 2.855906563 |
| GRMZM2G179802 | HSF         | 1.0mm | 2.849860982 |
| GRMZM2G139369 | NF-X1       | 1.0mm | 2.839322034 |
| GRMZM2G134545 | Dof         | 1.0mm | 2.820720059 |
| GRMZM2G098557 | SBP         | 1.0mm | 2.8203125   |



|               |          |       |             |
|---------------|----------|-------|-------------|
| GRMZM2G169654 | RAV      | 1.0mm | 2.805497925 |
| GRMZM2G116557 | ARF      | 1.0mm | 2.799946964 |
| GRMZM2G096600 | CPP      | 1.0mm | 2.786065704 |
| GRMZM2G106276 | HD-ZIP   | 1.0mm | 2.753188776 |
| GRMZM2G152862 | MIKC     | 1.0mm | 2.74408284  |
| GRMZM2G016649 | Trihelix | 1.0mm | 2.732813607 |
| GRMZM2G003514 | MIKC     | 1.0mm | 2.69541779  |
| GRMZM2G153454 | bHLH     | 1.0mm | 2.674684305 |
| GRMZM2G431156 | MYB      | 1.0mm | 2.632331283 |
| GRMZM2G060544 | LBD      | 1.0mm | 2.604942339 |
| GRMZM5G853392 | GRF      | 1.0mm | 2.571656051 |
| GRMZM2G074124 | YABBY    | 1.0mm | 2.559023066 |
| GRMZM2G171569 | ERF      | 1.0mm | 2.555205047 |
| GRMZM2G178741 | HD-ZIP   | 1.0mm | 2.554880694 |
| GRMZM2G104268 | FAR1     | 1.0mm | 2.541237113 |
| GRMZM2G004641 | TALE     | 1.0mm | 2.521609538 |
| GRMZM2G034638 | TCP      | 1.0mm | 2.47923588  |
| GRMZM2G171365 | MIKC     | 1.0mm | 2.476977729 |
| GRMZM2G126170 | HB-other | 1.0mm | 2.473348229 |
| GRMZM2G085678 | ERF      | 1.0mm | 2.473019518 |
| GRMZM2G017349 | bHLH     | 1.0mm | 2.465884079 |
| GRMZM2G116557 | ARF      | 1.0mm | 2.455823293 |
| GRMZM2G052616 | GATA     | 1.0mm | 2.451843044 |
| GRMZM2G041415 | MYB      | 1.0mm | 2.44200627  |
| GRMZM2G000171 | bZIP     | 1.0mm | 2.408484654 |
| GRMZM2G171179 | ERF      | 1.0mm | 2.377276115 |
| GRMZM5G880268 | Dof      | 1.0mm | 2.36645525  |
| GRMZM2G079470 | GRAS     | 1.0mm | 2.360888889 |
| GRMZM2G113078 | AP2      | 1.0mm | 2.356396867 |
| GRMZM2G148087 | WRKY     | 1.0mm | 2.343028229 |
| GRMZM2G386163 | NAC      | 1.0mm | 2.328735632 |
| GRMZM2G122076 | HD-ZIP   | 1.0mm | 2.32782292  |
| GRMZM2G171179 | ERF      | 1.0mm | 2.322962963 |
| GRMZM2G137510 | MIKC     | 1.0mm | 2.319758673 |
| GRMZM2G166946 | TCP      | 1.0mm | 2.315142198 |
| GRMZM2G336533 | NAC      | 1.0mm | 2.313117066 |
| GRMZM2G064630 | MYB      | 1.0mm | 2.306837319 |
| GRMZM2G126957 | NF-YA    | 1.0mm | 2.302362205 |
| GRMZM2G113098 | GATA     | 1.0mm | 2.285059978 |
| GRMZM2G151542 | ERF      | 1.0mm | 2.283093054 |
| GRMZM2G103647 | bZIP     | 1.0mm | 2.26869092  |
| GRMZM2G087741 | TALE     | 1.0mm | 2.25413403  |
| GRMZM2G027333 | C2H2     | 1.0mm | 2.239792131 |
| GRMZM2G164591 | ERF      | 1.0mm | 2.235989717 |
| GRMZM2G098904 | bZIP     | 1.0mm | 2.223463687 |
| GRMZM2G172621 | B3       | 1.0mm | 2.221378976 |
| GRMZM2G141219 | AP2      | 1.0mm | 2.205665025 |
| GRMZM2G024851 | bZIP     | 1.0mm | 2.196601942 |
| GRMZM5G812774 | BES1     | 1.0mm | 2.193208593 |

|               |             |       |             |
|---------------|-------------|-------|-------------|
| GRMZM2G088309 | YABBY       | 1.0mm | 2.191432396 |
| GRMZM2G142962 | HD-ZIP      | 1.0mm | 2.181132075 |
| GRMZM2G049159 | GRAS        | 1.0mm | 2.167137809 |
| GRMZM2G404973 | GATA        | 1.0mm | 2.166331321 |
| GRMZM2G136266 | bZIP        | 1.0mm | 2.164710485 |
| GRMZM2G306935 | C3H         | 1.0mm | 2.152099105 |
| GRMZM2G027563 | bHLH        | 1.0mm | 2.142410016 |
| GRMZM2G160687 | MIKC        | 1.0mm | 2.14229249  |
| GRMZM2G097059 | MIKC        | 1.0mm | 2.139388343 |
| GRMZM2G172657 | GRAS        | 1.0mm | 2.135502324 |
| GRMZM2G379179 | Trihelix    | 1.0mm | 2.131596695 |
| GRMZM2G310368 | ERF         | 1.0mm | 2.125984252 |
| GRMZM2G069082 | ERF         | 1.0mm | 2.123264312 |
| GRMZM2G082318 | GeBP        | 1.0mm | 2.115752829 |
| GRMZM2G027976 | bZIP        | 1.0mm | 2.111402359 |
| GRMZM2G086277 | C2H2        | 1.0mm | 2.101631117 |
| GRMZM2G163200 | GATA        | 1.0mm | 2.083616918 |
| GRMZM2G093305 | C2H2        | 1.0mm | 2.078774617 |
| GRMZM2G087955 | MYB         | 1.0mm | 2.076335878 |
| GRMZM2G093305 | C2H2        | 1.0mm | 2.075077399 |
| GRMZM2G030710 | ARF         | 1.0mm | 2.071456462 |
| GRMZM2G158162 | B3          | 1.0mm | 2.062742223 |
| GRMZM2G531738 | MYB_related | 1.0mm | 2.061936495 |
| GRMZM2G102845 | ARF         | 1.0mm | 2.061165049 |
| GRMZM2G162739 | NAC         | 1.0mm | 2.059100742 |
| GRMZM2G032336 | CAMTA       | 1.0mm | 2.057898187 |
| GRMZM2G010669 | MIKC        | 1.0mm | 2.056254626 |
| GRMZM5G829103 | NF-YA       | 1.0mm | 2.043197937 |
| GRMZM2G129428 | C2H2        | 1.0mm | 2.039702233 |
| GRMZM2G148723 | bHLH        | 1.0mm | 2.022844688 |
| GRMZM2G479110 | ARR-B       | 1.0mm | 2.021772939 |
| GRMZM2G151763 | WRKY        | 1.0mm | 2.021327014 |
| GRMZM2G320827 | Trihelix    | 1.0mm | 2.013457427 |

#### Transcription factors decreased in expression

| Gene ID       | Family      | Stage  | Relative intensity compared to previous stage |
|---------------|-------------|--------|-----------------------------------------------|
| GRMZM2G005624 | HD-ZIP      | 0.25mm | 0.159622444                                   |
| GRMZM2G087741 | TALE        | 0.25mm | 0.26545916                                    |
| GRMZM2G529859 | YABBY       | 0.25mm | 0.283557919                                   |
| GRMZM2G017087 | TALE        | 0.25mm | 0.28549975                                    |
| GRMZM2G160565 | MIKC        | 0.25mm | 0.289216096                                   |
| GRMZM2G134279 | MYB         | 0.25mm | 0.326057453                                   |
| GRMZM2G091201 | MYB_related | 0.25mm | 0.335834516                                   |
| GRMZM2G003514 | MIKC        | 0.25mm | 0.348528015                                   |
| GRMZM2G074543 | YABBY       | 0.25mm | 0.371785078                                   |
| GRMZM2G120320 | WRKY        | 0.25mm | 0.387650872                                   |
| GRMZM2G072582 | MIKC        | 0.25mm | 0.403132729                                   |

|               |             |        |             |
|---------------|-------------|--------|-------------|
| GRMZM2G353076 | ZF-HD       | 0.25mm | 0.414042553 |
| GRMZM2G005353 | YABBY       | 0.25mm | 0.41617357  |
| GRMZM2G028151 | AP2         | 0.25mm | 0.419765446 |
| GRMZM2G068973 | NAC         | 0.25mm | 0.422173145 |
| GRMZM2G108865 | Dof         | 0.25mm | 0.435992707 |
| GRMZM2G054795 | YABBY       | 0.25mm | 0.455377574 |
| GRMZM2G159431 | TALE        | 0.25mm | 0.460368641 |
| GRMZM2G162739 | NAC         | 0.25mm | 0.462047961 |
| GRMZM2G097349 | HD-ZIP      | 0.25mm | 0.462427746 |
| GRMZM2G169654 | RAV         | 0.25mm | 0.468571761 |
| GRMZM2G099522 | MIKC        | 0.25mm | 0.48069615  |
| GRMZM2G177693 | C2H2        | 0.25mm | 0.48503937  |
| GRMZM2G033570 | EIL         | 0.25mm | 0.486866792 |
| GRMZM2G430522 | NAC         | 0.25mm | 0.492150706 |
| GRMZM2G159500 | NAC         | 0.25mm | 0.493050133 |
| GRMZM2G030458 | GeBP        | 0.4mm  | TURN OFF    |
| GRMZM2G171468 | G2-like     | 0.4mm  | TURN OFF    |
| GRMZM2G124540 | G2-like     | 0.4mm  | TURN OFF    |
| GRMZM2G159119 | G2-like     | 0.4mm  | TURN OFF    |
| GRMZM2G018254 | GRAS        | 0.4mm  | TURN OFF    |
| GRMZM2G169580 | Trihelix    | 0.4mm  | TURN OFF    |
| GRMZM2G005624 | HD-ZIP      | 0.4mm  | TURN OFF    |
| GRMZM2G003514 | MIKC        | 0.4mm  | TURN OFF    |
| GRMZM2G529859 | YABBY       | 0.4mm  | 0.274272016 |
| GRMZM2G069082 | ERF         | 0.4mm  | 0.325882688 |
| GRMZM2G160565 | MIKC        | 0.4mm  | 0.387619323 |
| GRMZM2G124037 | ERF         | 0.4mm  | 0.440029077 |
| GRMZM2G087741 | TALE        | 0.4mm  | 0.455888744 |
| GRMZM2G134279 | MYB         | 0.4mm  | 0.472077697 |
| GRMZM2G068973 | NAC         | 0.4mm  | 0.480435237 |
| GRMZM2G017087 | TALE        | 0.4mm  | 0.481589714 |
| GRMZM2G119823 | bHLH        | 0.7mm  | TURN OFF    |
| GRMZM2G136887 | MYB_related | 0.7mm  | TURN OFF    |
| GRMZM2G080731 | bZIP        | 0.7mm  | TURN OFF    |
| GRMZM2G162481 | WOX         | 0.7mm  | TURN OFF    |
| GRMZM2G307119 | ERF         | 0.7mm  | TURN OFF    |
| GRMZM2G099319 | TALE        | 0.7mm  | TURN OFF    |
| GRMZM2G145041 | MYB_related | 0.7mm  | TURN OFF    |
| GRMZM2G370863 | ZF-HD       | 0.7mm  | TURN OFF    |
| GRMZM2G145579 | bHLH        | 0.7mm  | 0.154879494 |
| GRMZM5G829103 | NF-YA       | 0.7mm  | 0.225928623 |
| GRMZM5G805685 | B3          | 0.7mm  | 0.262887847 |
| GRMZM2G169654 | RAV         | 0.7mm  | 0.33937687  |
| GRMZM2G158328 | WRKY        | 0.7mm  | 0.354982818 |
| GRMZM2G159500 | NAC         | 0.7mm  | 0.363272311 |
| GRMZM2G180190 | LFY         | 0.7mm  | 0.365514392 |
| GRMZM2G116557 | ARF         | 0.7mm  | 0.378880739 |
| GRMZM2G061408 | WRKY        | 0.7mm  | 0.393756129 |
| GRMZM2G045431 | bHLH        | 0.7mm  | 0.400946814 |

|               |          |       |             |
|---------------|----------|-------|-------------|
| GRMZM2G060216 | bZIP     | 0.7mm | 0.401126485 |
| GRMZM2G027298 | C3H      | 0.7mm | 0.404302671 |
| GRMZM2G386163 | NAC      | 0.7mm | 0.412713472 |
| GRMZM5G803308 | MYB      | 0.7mm | 0.413376459 |
| GRMZM2G060216 | bZIP     | 0.7mm | 0.416708271 |
| GRMZM2G127857 | MYB      | 0.7mm | 0.417561592 |
| GRMZM2G004957 | HD-ZIP   | 0.7mm | 0.417779898 |
| GRMZM2G310368 | ERF      | 0.7mm | 0.423335745 |
| GRMZM5G882527 | bHLH     | 0.7mm | 0.423863162 |
| GRMZM2G120320 | WRKY     | 0.7mm | 0.431205441 |
| GRMZM2G098813 | LFY      | 0.7mm | 0.447590661 |
| GRMZM2G123900 | Dof      | 0.7mm | 0.448290184 |
| GRMZM2G097683 | SRS      | 0.7mm | 0.460297507 |
| GRMZM2G174284 | bZIP     | 0.7mm | 0.463846385 |
| GRMZM2G139963 | HD-ZIP   | 0.7mm | 0.468666667 |
| GRMZM2G133331 | bZIP     | 0.7mm | 0.469170579 |
| GRMZM2G301089 | bHLH     | 0.7mm | 0.483369883 |
| GRMZM2G178741 | HD-ZIP   | 0.7mm | 0.487521151 |
| GRMZM2G453001 | STAT     | 0.7mm | 0.494759473 |
| GRMZM2G134545 | Dof      | 0.7mm | 0.498534799 |
| GRMZM2G065374 | bHLH     | 1.0mm | TURN OFF    |
| GRMZM2G327189 | Dof      | 1.0mm | TURN OFF    |
| GRMZM2G153333 | GRAS     | 1.0mm | TURN OFF    |
| GRMZM2G002915 | HD-ZIP   | 1.0mm | TURN OFF    |
| GRMZM2G470307 | MYB      | 1.0mm | TURN OFF    |
| GRMZM2G312201 | NAC      | 1.0mm | TURN OFF    |
| GRMZM2G034563 | G2-like  | 1.0mm | 0.043339578 |
| GRMZM2G102218 | YABBY    | 1.0mm | 0.090284694 |
| GRMZM2G096709 | GRF      | 1.0mm | 0.105003817 |
| GRMZM2G100146 | C2H2     | 1.0mm | 0.122588993 |
| GRMZM2G338259 | ARF      | 1.0mm | 0.129574468 |
| GRMZM2G393433 | NAC      | 1.0mm | 0.14172688  |
| GRMZM2G378580 | ARF      | 1.0mm | 0.188027274 |
| GRMZM5G804893 | NF-YB    | 1.0mm | 0.189824773 |
| GRMZM2G113779 | SBP      | 1.0mm | 0.206116839 |
| GRMZM2G069146 | ERF      | 1.0mm | 0.214033019 |
| GRMZM5G894234 | NAC      | 1.0mm | 0.228860936 |
| GRMZM2G113127 | NF-YC    | 1.0mm | 0.24367077  |
| GRMZM2G392516 | GeBP     | 1.0mm | 0.25477707  |
| GRMZM5G887286 | C2H2     | 1.0mm | 0.259254482 |
| GRMZM2G006493 | C3H      | 1.0mm | 0.264980491 |
| GRMZM2G041223 | GRF      | 1.0mm | 0.280744068 |
| GRMZM2G076272 | TALE     | 1.0mm | 0.284058522 |
| GRMZM2G352159 | ARF      | 1.0mm | 0.286424355 |
| GRMZM2G050939 | C2H2     | 1.0mm | 0.29821718  |
| GRMZM2G159357 | HB-other | 1.0mm | 0.304162725 |
| GRMZM2G102514 | BES1     | 1.0mm | 0.315651626 |
| GRMZM2G033413 | bZIP     | 1.0mm | 0.317846656 |
| GRMZM2G065506 | GeBP     | 1.0mm | 0.318018665 |

|               |             |       |             |
|---------------|-------------|-------|-------------|
| GRMZM2G039828 | bZIP        | 1.0mm | 0.318021631 |
| GRMZM2G701689 | CPP         | 1.0mm | 0.319008759 |
| GRMZM2G019446 | bZIP        | 1.0mm | 0.320781313 |
| GRMZM2G133169 | GRAS        | 1.0mm | 0.324274471 |
| GRMZM2G123140 | HD-ZIP      | 1.0mm | 0.33064776  |
| GRMZM2G154641 | TALE        | 1.0mm | 0.331354972 |
| GRMZM2G129147 | GRF         | 1.0mm | 0.338819415 |
| GRMZM2G069408 | bHLH        | 1.0mm | 0.343832021 |
| GRMZM2G031120 | NAC         | 1.0mm | 0.34404708  |
| GRMZM2G053503 | ERF         | 1.0mm | 0.347585662 |
| GRMZM2G702026 | ARF         | 1.0mm | 0.353558926 |
| GRMZM2G156016 | VOZ         | 1.0mm | 0.35942492  |
| GRMZM2G120740 | C3H         | 1.0mm | 0.366255144 |
| GRMZM2G479110 | ARR-B       | 1.0mm | 0.369612069 |
| GRMZM2G109987 | HD-ZIP      | 1.0mm | 0.369684607 |
| GRMZM2G048450 | WRKY        | 1.0mm | 0.373132346 |
| GRMZM2G174917 | ERF         | 1.0mm | 0.380319497 |
| GRMZM2G312201 | NAC         | 1.0mm | 0.383005255 |
| GRMZM2G126957 | NF-YA       | 1.0mm | 0.38499385  |
| GRMZM2G003944 | TCP         | 1.0mm | 0.386550308 |
| GRMZM2G064541 | NAC         | 1.0mm | 0.386563416 |
| GRMZM2G022213 | C2H2        | 1.0mm | 0.388605442 |
| GRMZM2G173425 | LSD         | 1.0mm | 0.389802875 |
| GRMZM2G096759 | MYB_related | 1.0mm | 0.391697493 |
| GRMZM2G061487 | ERF         | 1.0mm | 0.392430279 |
| GRMZM2G055204 | ERF         | 1.0mm | 0.392656808 |
| GRMZM2G341747 | CAMTA       | 1.0mm | 0.395641646 |
| GRMZM2G089406 | MYB_related | 1.0mm | 0.398830007 |
| GRMZM2G479110 | ARR-B       | 1.0mm | 0.401297947 |
| GRMZM2G431157 | C2H2        | 1.0mm | 0.404473439 |
| GRMZM2G456568 | NAC         | 1.0mm | 0.405565979 |
| GRMZM2G174240 | GeBP        | 1.0mm | 0.406111536 |
| GRMZM2G431157 | C2H2        | 1.0mm | 0.406652807 |
| GRMZM2G370777 | MIKC        | 1.0mm | 0.413241293 |
| GRMZM2G389567 | bHLH        | 1.0mm | 0.415374241 |
| GRMZM2G125777 | NAC         | 1.0mm | 0.417694933 |
| GRMZM2G031001 | NAC         | 1.0mm | 0.417739483 |
| GRMZM2G071907 | WRKY        | 1.0mm | 0.417923959 |
| GRMZM2G009530 | GATA        | 1.0mm | 0.419946174 |
| GRMZM2G174776 | NF-YC       | 1.0mm | 0.421550355 |
| GRMZM2G151407 | WRKY        | 1.0mm | 0.421917808 |
| GRMZM5G805026 | WOX         | 1.0mm | 0.422074604 |
| GRMZM2G396451 | GATA        | 1.0mm | 0.426806613 |
| GRMZM2G114461 | FAR1        | 1.0mm | 0.427480916 |
| GRMZM2G050590 | E2F/DP      | 1.0mm | 0.427574171 |
| GRMZM2G164735 | BBR-BPC     | 1.0mm | 0.431788653 |
| GRMZM2G064197 | G2-like     | 1.0mm | 0.438966877 |
| GRMZM2G379608 | NAC         | 1.0mm | 0.442261104 |
| GRMZM2G416652 | MYB         | 1.0mm | 0.447083775 |

|               |             |       |             |
|---------------|-------------|-------|-------------|
| GRMZM2G126018 | SBP         | 1.0mm | 0.449616648 |
| GRMZM2G101499 | SBP         | 1.0mm | 0.450732137 |
| GRMZM2G013657 | AP2         | 1.0mm | 0.450952717 |
| GRMZM2G125777 | NAC         | 1.0mm | 0.451251841 |
| GRMZM2G003304 | HD-ZIP      | 1.0mm | 0.451289398 |
| GRMZM2G070034 | MIKC        | 1.0mm | 0.451731375 |
| GRMZM2G339848 | HB-other    | 1.0mm | 0.453190676 |
| GRMZM2G169316 | MYB         | 1.0mm | 0.454652256 |
| GRMZM2G033138 | HB-other    | 1.0mm | 0.456330081 |
| GRMZM2G030744 | bHLH        | 1.0mm | 0.459872458 |
| GRMZM2G095598 | CO-like     | 1.0mm | 0.460066393 |
| GRMZM2G338259 | ARF         | 1.0mm | 0.463735361 |
| GRMZM2G403620 | MYB         | 1.0mm | 0.465581051 |
| GRMZM2G032336 | CAMTA       | 1.0mm | 0.465858328 |
| GRMZM2G179049 | NAC         | 1.0mm | 0.4660523   |
| GRMZM2G092091 | bHLH        | 1.0mm | 0.469780609 |
| GRMZM2G028980 | ARF         | 1.0mm | 0.470108696 |
| GRMZM2G130854 | WRKY        | 1.0mm | 0.472826087 |
| GRMZM2G081812 | C2H2        | 1.0mm | 0.475670308 |
| GRMZM2G060216 | bZIP        | 1.0mm | 0.476190476 |
| GRMZM2G006871 | GeBP        | 1.0mm | 0.477103301 |
| GRMZM2G139815 | WRKY        | 1.0mm | 0.479763861 |
| GRMZM2G067743 | GRF         | 1.0mm | 0.481185031 |
| GRMZM2G150262 | C3H         | 1.0mm | 0.483062331 |
| GRMZM2G129428 | C2H2        | 1.0mm | 0.483926423 |
| GRMZM2G025685 | HSF         | 1.0mm | 0.489446388 |
| GRMZM2G061906 | bHLH        | 1.0mm | 0.490433577 |
| GRMZM2G125239 | GeBP        | 1.0mm | 0.493167325 |
| GRMZM2G384528 | NF-YB       | 1.0mm | 0.493708609 |
| GRMZM2G069009 | C3H         | 1.0mm | 0.495503999 |
| GRMZM2G095239 | MYB_related | 1.0mm | 0.49656035  |

---

Transcription factors that are turned ON/OFF or UP/DOWN-regulated by at least two fold compared to previous stage. Gene identifiers, gene families, stages when differential transcript accumulation occurs and relative intensity of transcripts compared to prior stages are listed.

**Table S7 Meiotic gene expression at five stages of early anther development.**

| MaizeGdbProteinID | MaizeGdbProteinName                                                                 | 0.15mm | 0.25mm | 0.4mm | 0.7mm | 1.0mm |
|-------------------|-------------------------------------------------------------------------------------|--------|--------|-------|-------|-------|
| AC198518.3_FG002  | Sterile alpha motif (SAM) domain-containing protein                                 | ON     | ON     | ON    | ON    | ON    |
| AC207628.4_FG005  | Porin/voltage-dependent anion-selective channel protein, alpha amylase activity     | OFF    | ON     | ON    | ON    | ON    |
| AC231745.1_FGT004 | Protein-tyrosine sulfotransferase†                                                  | ON     | ON     | ON    | ON    | ON    |
| GRMZM2G000397     | Calcium-binding EF hand family protein                                              | ON     | ON     | ON    | ON    | ON    |
| GRMZM2G001803     | ZIP metal ion transporter family UBA/THIF-type NAD/FAD binding fold                 | ON     | ON     | ON    | ON    | ON    |
| GRMZM2G002765     | RNA recognition motif 2                                                             | ON     | ON     | ON    | ON    | ON    |
| GRMZM2G004455     | Mitochondrial processing peptidase, alpha subunit                                   | ON     | ON     | ON    | ON    | ON    |
| GRMZM2G005036     | Splicing factor 3b, subunit 4                                                       | ON     | ON     | ON    | ON    | ON    |
| GRMZM2G005374     | RecF/RecN/SMC protein, N-terminal                                                   | ON     | ON     | ON    | ON    | ON    |
| GRMZM2G006452     | RecF/RecN/SMC protein, N-terminal                                                   | ON     | ON     | ON    | ON    | ON    |
| GRMZM2G006452     | Tropomyosin                                                                         | ON     | ON     | ON    | ON    | ON    |
| GRMZM2G006452     | RecF/RecN/SMC protein, N-terminal                                                   | ON     | ON     | ON    | ON    | ON    |
| GRMZM2G006452     | BBD: bifunctional nuclease in wound defense                                         | ON     | ON     | ON    | ON    | ON    |
| GRMZM2G007300     | Ubiquitin carrier protein                                                           | ON     | ON     | ON    | ON    | ON    |
| GRMZM2G008226     | Trehalose-6-phosphate synthase                                                      | ON     | ON     | OFF   | ON    | OFF   |
| GRMZM2G011078     | Secretory carrier membrane protein, SC3, transport                                  | ON     | ON     | ON    | ON    | ON    |
| GRMZM2G012030     | Vinculin/alpha-catenin                                                              | ON     | ON     | ON    | ON    | ON    |
| GRMZM2G016602     | protein recA                                                                        | ON     | ON     | ON    | ON    | ON    |
| GRMZM2G019596     | Vamp/synaptobrevin-associated protein 27-2; major sperm protein                     | ON     | ON     | ON    | ON    | ON    |
| GRMZM2G019596     | Vamp/synaptobrevin-associated protein 27-2; major sperm protein                     | ON     | ON     | ON    | ON    | ON    |
| GRMZM2G020974     | DNA breaking-rejoining enzyme, catalytic core                                       | ON     | ON     | ON    | ON    | ON    |
| GRMZM2G021270     | hypothetical protein                                                                | ON     | ON     | ON    | ON    | ON    |
| GRMZM2G021270     | LOC100193866                                                                        | ON     | ON     | ON    | ON    | ON    |
| GRMZM2G021270     | DNA topoisomerase, type IIA, subunit A or C-termin                                  | ON     | ON     | ON    | ON    | ON    |
| GRMZM2G024739     | Cryptochrome/DNA photolyase, class 1 conserved sit                                  | ON     | ON     | ON    | ON    | ON    |
| GRMZM2G028369     | Chorismate mutase precursor                                                         | ON     | ON     | ON    | ON    | ON    |
| GRMZM2G028640     | Cupin superfamily enzyme                                                            | ON     | ON     | ON    | ON    | ON    |
| GRMZM2G028763     | Membrane related protein-like Chaperone (DnaJ); mitochondrial import inner membrane | ON     | ON     | ON    | ON    | ON    |
| GRMZM2G029385     | translocase subunit TIM14                                                           | ON     | ON     | ON    | ON    | ON    |
| GRMZM2G030523     | Proliferating cell nuclear antigen, PCNA                                            | ON     | ON     | ON    | ON    | ON    |
| GRMZM2G032003     | UTP--glucose-1-phosphate uridylyltransferase†                                       | ON     | ON     | ON    | ON    | ON    |
| GRMZM2G032562     | SCF ubiquitin ligase, Skp1                                                          | ON     | ON     | ON    | ON    | ON    |

|               |                                                                                      |     |     |     |     |     |  |
|---------------|--------------------------------------------------------------------------------------|-----|-----|-----|-----|-----|--|
|               | component; SKP1-like protein 1B<br>(mediates cell cycle)                             |     |     |     |     |     |  |
| GRMZM2G034631 | Tyrosylprotein sulfotransferase                                                      | ON  | ON  | ON  | ON  | ON  |  |
| GRMZM2G035996 | Shaggy kinase homolog Fragment                                                       | ON  | ON  | ON  | ON  | OFF |  |
| GRMZM2G036765 | Aspartate decarboxylase-like fold                                                    | ON  | ON  | ON  | ON  | ON  |  |
| GRMZM2G039094 | MATH domain containing protein                                                       | ON  | ON  | ON  | ON  | ON  |  |
| GRMZM2G041418 | NADH-dehydrogenase<br>(ubiquinone),                                                  | OFF | ON  | OFF | ON  | ON  |  |
| GRMZM2G042477 | Monoglyceride lipase isoform 2-<br>like, partial (90%)                               | ON  | ON  | ON  | ON  | ON  |  |
| GRMZM2G043509 | Endonuclease/Exonuclease/phosp<br>hatase family; DNaseI-like                         | ON  | ON  | ON  | ON  | ON  |  |
| GRMZM2G044011 | eRF1 domain 3                                                                        | ON  | ON  | ON  | ON  | ON  |  |
| GRMZM2G046055 | Histone H2A                                                                          | ON  | ON  | ON  | ON  | ON  |  |
| GRMZM2G047204 | Peptidyl-prolyl glycoprotein;<br>histidine kinase                                    | ON  | ON  | ON  | ON  | ON  |  |
| GRMZM2G050329 | Major Facilitator Superfamily with<br>SPX (SYG1/Pho81/XPR1)                          | ON  | ON  | ON  | ON  | ON  |  |
| GRMZM2G050684 | Predicted membrane protein,<br>contains two CBS domains                              | ON  | ON  | ON  | ON  | ON  |  |
| GRMZM2G050684 | CBS domain containing protein                                                        | ON  | ON  | ON  | ON  | ON  |  |
| GRMZM2G052403 | hypothetical protein<br>LOC100383700                                                 | ON  | ON  | ON  | ON  | ON  |  |
| GRMZM2G054115 | Alliinase EGF-like domain;<br>Pyridoxal phosphate (PLP)-<br>dependent transferases † | ON  | ON  | ON  | ON  | ON  |  |
| GRMZM2G055807 | Restriction endonuclease, type I,<br>R subunit/Type I                                | ON  | ON  | ON  | ON  | ON  |  |
| GRMZM2G055807 | DNA repair and transcription<br>factor XPB1                                          | ON  | ON  | ON  | ON  | ON  |  |
| GRMZM2G056075 | DNA mismatch repair protein<br>MSH2 (MUS1)                                           | ON  | ON  | ON  | ON  | ON  |  |
| GRMZM2G057652 | Protein of unknown function<br>DUF1751, integral memb                                | ON  | ON  | OFF | OFF | ON  |  |
| GRMZM2G058954 | ATPase, AAA+ type, core<br>DNA repair protein                                        | ON  | ON  | ON  | ON  | ON  |  |
| GRMZM2G058954 | RAD51/RHP55, single stranded<br>DNA repair                                           | ON  | ON  | ON  | ON  | ON  |  |
| GRMZM2G060394 | SKP1-like protein 1A                                                                 | ON  | ON  | OFF | ON  | ON  |  |
| GRMZM2G061023 | RuvA domain 2-like                                                                   | ON  | ON  | ON  | ON  | ON  |  |
| GRMZM2G062761 | MAP kinase, conserved site                                                           | ON  | ON  | ON  | ON  | ON  |  |
| GRMZM2G062914 | Serine/threonine protein kinase-<br>related                                          | ON  | ON  | ON  | ON  | ON  |  |
| GRMZM2G063316 | SET domain-containing<br>protein,Rubisco<br>methyltransferase family protein         | ON  | ON  | ON  | ON  | ON  |  |
| GRMZM2G063961 | Serine/threonine-protein kinase<br>SAPK4                                             | ON  | ON  | ON  | ON  | ON  |  |
| GRMZM2G064868 | Putative 5-3 exonuclease                                                             | ON  | ON  | ON  | ON  | ON  |  |
| GRMZM2G064868 | Zinc finger, CCHC-type                                                               | ON  | ON  | ON  | ON  | ON  |  |
| GRMZM2G070047 | Ubiquitin-conjugating<br>enzyme/RWD-like                                             | OFF | OFF | OFF | OFF | OFF |  |
| GRMZM2G070639 | Kinesin-like protein                                                                 | OFF | OFF | OFF | OFF | ON  |  |
| GRMZM2G071304 | ATP dependent DNA ligase,<br>central                                                 | ON  | ON  | ON  | ON  | ON  |  |
| GRMZM2G071304 | ATP dependent DNA ligase,                                                            | ON  | ON  | ON  | ON  | ON  |  |



|               |                                                                                           |     |     |     |     |     |
|---------------|-------------------------------------------------------------------------------------------|-----|-----|-----|-----|-----|
|               | central                                                                                   |     |     |     |     |     |
| GRMZM2G071630 | Glyceraldehyde 3-phosphate dehydrogenase (GAPC3)                                          | ON  | ON  | ON  | ON  | ON  |
| GRMZM2G072088 | Unknown function, localized to plasma membrane                                            | ON  | ON  | OFF | ON  | ON  |
| GRMZM2G074082 | Shugoshin, N-terminal                                                                     | ON  | ON  | OFF | ON  | ON  |
| GRMZM2G074818 | Rad21/Rec8 like protein, N-terminal                                                       | ON  | ON  | ON  | ON  | ON  |
| GRMZM2G074818 | Rad21/Rec8 like protein, N-terminal                                                       | ON  | ON  | ON  | ON  | ON  |
| GRMZM2G074818 | Rad21/Rec8 like protein, N-terminal                                                       | ON  | ON  | ON  | ON  | ON  |
| GRMZM2G077823 | Arginine:serine-rich splicing factor SC35                                                 | ON  | ON  | ON  | ON  | ON  |
| GRMZM2G079613 | Tetratricopeptide TPR-1 Phosphoribosyl-AMP                                                | ON  | ON  | ON  | ON  | ON  |
| GRMZM2G082214 | cyclohydrolase                                                                            | ON  | ON  | ON  | ON  | ON  |
| GRMZM2G083394 | DCD domain protein - involved in development and cell death during HR response            | ON  | ON  | ON  | ON  | ON  |
| GRMZM2G083475 | Prefoldin                                                                                 | ON  | ON  | ON  | ON  | ON  |
| GRMZM2G083975 | Splicing factor RSZ33 (RSZ33)                                                             | ON  | ON  | ON  | ON  | ON  |
| GRMZM2G084762 | DNA repair and recombination, RecA-like                                                   | ON  | ON  | ON  | ON  | ON  |
| GRMZM2G088162 | hypothetical protein LOC100276374                                                         | ON  | ON  | ON  | ON  | ON  |
| GRMZM2G090152 | Core-2/I-Branching enzyme, beta-1,6-N-acetylglucosaminyltransferase, role in salt stress. | ON  | ON  | ON  | ON  | ON  |
| GRMZM2G090262 | C-terminal phosphatase-like 4; NLI interacting factor-like phosphatase                    | ON  | ON  | ON  | ON  | ON  |
| GRMZM2G091656 | GRAS domain family, RGA-like 2                                                            | ON  | ON  | ON  | ON  | ON  |
| GRMZM2G092232 | Kinesin, motor region                                                                     | ON  | ON  | ON  | ON  | ON  |
| GRMZM2G093119 | Rad21/Rec8 like protein, N-terminal                                                       | ON  | ON  | ON  | ON  | ON  |
| GRMZM2G093623 | DNA mismatch repair protein MutS, C-terminal                                              | ON  | ON  | OFF | ON  | ON  |
| GRMZM2G096070 | WD40 repeat-like                                                                          | ON  | ON  | ON  | ON  | ON  |
| GRMZM2G097605 | Helicase-like, DEXD box c2 type                                                           | ON  | ON  | ON  | ON  | ON  |
| GRMZM2G099080 | SNX2b: sorting nexin 2B; phox domain containing protein                                   | ON  | ON  | ON  | ON  | ON  |
| GRMZM2G100103 | Poor homologous synapsis 1 (PHS1) (meiosis chromosome pairing)                            | OFF | OFF | OFF | OFF | ON  |
| GRMZM2G101613 | Cyclin-dependent kinase inhibitor                                                         | OFF | ON  | ON  | ON  | ON  |
| GRMZM2G102088 | Serine/threonine protein kinase-related                                                   | ON  | ON  | ON  | ON  | ON  |
| GRMZM2G103287 | Apospory-associated proteion aldose 1-epimerase                                           | ON  | ON  | ON  | ON  | ON  |
| GRMZM2G103287 | Apospory-associated protein; aldose 1-epimerase                                           | ON  | ON  | ON  | ON  | ON  |
| GRMZM2G105250 | AGO18a; Translation initiation factor 2C (eIF-2C)                                         | ON  | ON  | ON  | ON  | OFF |
| GRMZM2G105387 | MADS32; transcription factor; homolog of AtAGAMOUS-like 12                                | OFF | OFF | OFF | OFF | OFF |

|               |                                                                                         |     |     |     |     |     |
|---------------|-----------------------------------------------------------------------------------------|-----|-----|-----|-----|-----|
| GRMZM2G108712 | Proliferating cell nuclear antigen, PCNA                                                | ON  | ON  | ON  | ON  | ON  |
| GRMZM2G109383 | Phosphoglucomutase, cytoplasmic                                                         | ON  | ON  | ON  | ON  | ON  |
| GRMZM2G109383 | Phosphoglucomutase, cytoplasmic 1 (PGM 1)(EC 5.4.2), phosphomannomutase                 | ON  | ON  | ON  | ON  | ON  |
| GRMZM2G109496 | Serine/threonine protein phosphatase                                                    | ON  | ON  | ON  | ON  | ON  |
| GRMZM2G109618 | DMC1 protein type B, DNA repair during meiotic recombination                            | OFF | OFF | OFF | OFF | OFF |
| GRMZM2G110212 | DNA mismatch repair protein MutS-like, N-terminal                                       | ON  | ON  | ON  | ON  | ON  |
| GRMZM2G111436 | Predicted 3'-5' exonuclease, Werner syndrome DNA helicase, nucleosidase                 | ON  | ON  | ON  | ON  | ON  |
| GRMZM2G113228 | Endonuclease III, 4Fe4S cluster, base excision repair                                   | ON  | ON  | ON  | ON  | ON  |
| GRMZM2G113967 | NAF                                                                                     | ON  | ON  | OFF | ON  | ON  |
| GRMZM2G115013 | RPA1a, replication protein required for meiotic DNA repair                              | ON  | ON  | ON  | ON  | ON  |
| GRMZM2G115504 | alpha / beta esterase; thioesterase; hydrolase                                          | ON  | ON  | ON  | ON  | ON  |
| GRMZM2G116243 | 1-acylglycerol-3-phosphate O-acyltransferase                                            | ON  | ON  | ON  | ON  | ON  |
| GRMZM2G116427 | Metal ion binding; mitochondrial protein                                                | ON  | ON  | ON  | ON  | ON  |
| GRMZM2G119886 | Arf GTPase activating protein                                                           | ON  | ON  | ON  | ON  | ON  |
| GRMZM2G121210 | DNA topoisomerase, type IIA, central                                                    | ON  | ON  | ON  | ON  | ON  |
| GRMZM2G121262 | Helix-hairpin-helix motif, class 2                                                      | ON  | ON  | ON  | ON  | ON  |
| GRMZM2G121312 | Leucine-rich repeat, typical subtype                                                    | ON  | ON  | ON  | ON  | ON  |
| GRMZM2G121543 | DNA repair protein RAD51                                                                | ON  | ON  | ON  | ON  | ON  |
| GRMZM2G122306 | Nucleic acid-binding, OB-fold-like P-loop ATP hydrolase, CH (Calponin Homology) domain, | ON  | ON  | ON  | ON  | ON  |
| GRMZM2G122965 | KINESIN motor domain containing                                                         | OFF | OFF | OFF | OFF | ON  |
| GRMZM2G123776 | Thioredoxin or redox protein                                                            | ON  | ON  | ON  | ON  | ON  |
| GRMZM2G124365 | Chorismate mutase                                                                       | ON  | ON  | OFF | ON  | ON  |
| GRMZM2G124691 | Cyclin                                                                                  | OFF | ON  | OFF | ON  | ON  |
| GRMZM2G124718 | Poly(ADP-ribose) polymerase, catalytic region                                           | ON  | ON  | ON  | ON  | ON  |
| GRMZM2G127893 | hypothetical protein LOC100217125                                                       | ON  | ON  | OFF | ON  | ON  |
| GRMZM2G128771 | GTPase Rab6/YPT6/Ryh1, small G protein superfamily                                      | ON  | ON  | ON  | ON  | ON  |
| GRMZM2G129175 | Uncharacterized, contains transmembrane domain                                          | ON  | ON  | ON  | ON  | ON  |
| GRMZM2G129913 | Spo11/DNA topoisomerase VI, subunit A                                                   | ON  | ON  | ON  | ON  | ON  |
| GRMZM2G131443 | Aldehyde dehydrogenase, conserved site                                                  | ON  | ON  | ON  | ON  | ON  |
| GRMZM2G133006 | MATE efflux family protein                                                              | ON  | OFF | OFF | OFF | ON  |
| GRMZM2G133048 | Phosphatidate cytidylyltransferase†                                                     | ON  | ON  | ON  | ON  | ON  |
| GRMZM2G133952 | DNA mismatch repair, conserved                                                          | ON  | ON  | ON  | ON  | ON  |

|               |                                                                                                                         |     |     |     |     |     |
|---------------|-------------------------------------------------------------------------------------------------------------------------|-----|-----|-----|-----|-----|
|               | site                                                                                                                    |     |     |     |     |     |
| GRMZM2G134502 | Emp24/gp25L/p24 membrane trafficking; phospholipid binding; annexin                                                     | ON  | ON  | ON  | ON  | ON  |
| GRMZM2G134708 | Monodehydroascorbate/ferredoxin reductase                                                                               | ON  | ON  | ON  | ON  | ON  |
| GRMZM2G135073 | Ste20-like serine/threonine protein kinase                                                                              | ON  | ON  | ON  | ON  | ON  |
| GRMZM2G135654 | Ribosomal protein L7Ae/L30e/S12e/Gadd45 GTPase Rab1/YPT1, small G protein superfamily, and related GTP-binding proteins | ON  | ON  | ON  | ON  | ON  |
| GRMZM2G136455 | Predicted K <sup>+</sup> /H <sup>+</sup> -antiporter                                                                    | OFF | ON  | ON  | ON  | ON  |
| GRMZM2G136710 | DSB repair, DNA helicase - NHEJ (non homologous end joining) double stranded break                                      | ON  | ON  | ON  | ON  | ON  |
| GRMZM2G137968 | Calcium binding atopy-related autoantigen 1 (LOC10                                                                      | ON  | ON  | ON  | ON  | ON  |
| GRMZM2G138566 | GDP-mannose 3\5\ epimerase; dehydratase                                                                                 | ON  | ON  | ON  | ON  | ON  |
| GRMZM2G138907 | 8-oxoguanine DNA glycosylase, N-terminal                                                                                | ON  | ON  | ON  | ON  | ON  |
| GRMZM2G139031 | Rhomboid domain containing 1                                                                                            | ON  | ON  | ON  | ON  | ON  |
| GRMZM2G140994 | WD40 repeat                                                                                                             | ON  | ON  | ON  | ON  | ON  |
| GRMZM2G143211 | Ubiquitin-associated/translation elongation factor                                                                      | ON  | ON  | ON  | ON  | ON  |
| GRMZM2G143462 | Synaptonemal complex central region protein ZYP1-1                                                                      | ON  | ON  | ON  | ON  | ON  |
| GRMZM2G143590 | Splicing factor, SPF45                                                                                                  | ON  | ON  | ON  | ON  | ON  |
| GRMZM2G145034 | Transcription initiation factor IIF, large subunit (RAP74)                                                              | ON  | ON  | ON  | ON  | ON  |
| GRMZM2G145085 | Triosephosphate isomerase                                                                                               | ON  | ON  | OFF | ON  | ON  |
| GRMZM2G146206 | BRCT                                                                                                                    | ON  | ON  | ON  | ON  | ON  |
| GRMZM2G146490 | DEAD-like helicase, N-terminal hypothetical protein                                                                     | OFF | OFF | OFF | OFF | OFF |
| GRMZM2G148249 | LOC100383454                                                                                                            | ON  | ON  | ON  | ON  | ON  |
| GRMZM2G149289 | Galactosyltransferases                                                                                                  | ON  | ON  | ON  | ON  | ON  |
| GRMZM2G153760 | Mitochondrial K <sup>+</sup> -H <sup>+</sup> exchange-related                                                           | ON  | ON  | ON  | ON  | ON  |
| GRMZM2G153899 | Pumilio-family RNA binding repeat†                                                                                      | OFF | OFF | OFF | OFF | OFF |
| GRMZM2G155806 | Acetyl-CoA synthetase                                                                                                   | OFF | ON  | OFF | OFF | OFF |
| GRMZM2G157269 | EGG APPARATUS-1 protein                                                                                                 | ON  | ON  | ON  | ON  | ON  |
| GRMZM2G157505 | Rad51, C-terminal                                                                                                       | OFF | OFF | OFF | OFF | OFF |
| GRMZM2G157817 | VH1-interacting kinase; ankyrin repeat containing                                                                       | ON  | ON  | ON  | ON  | ON  |
| GRMZM2G159034 | ATPase associated with various cellular activities                                                                      | OFF | ON  | OFF | ON  | OFF |
| GRMZM2G159307 | NADP <sup>+</sup> -dependent malic enzyme                                                                               | ON  | ON  | ON  | ON  | ON  |
| GRMZM2G159724 | Heat shock protein                                                                                                      | ON  | ON  | ON  | ON  | ON  |
| GRMZM2G162968 | Leafbladeless1-like                                                                                                     | ON  | ON  | ON  | ON  | ON  |
| GRMZM2G163514 | RXW8 protein, Lipase, GDSL                                                                                              | ON  | ON  | ON  | ON  | ON  |
| GRMZM2G164470 | Alpha-D-phosphohexomutase, alpha/beta/alpha I, II                                                                       | ON  | OFF | OFF | ON  | ON  |
| GRMZM2G166597 |                                                                                                                         |     |     |     |     |     |

|               |                                                                                  |     |     |     |     |     |
|---------------|----------------------------------------------------------------------------------|-----|-----|-----|-----|-----|
| GRMZM2G166658 | Serine/threonine protein kinase-related                                          | ON  | ON  | ON  | ON  | ON  |
| GRMZM2G169089 | Acyl-CoA:diacylglycerol acyltransferase 1                                        | ON  | ON  | ON  | ON  | OFF |
| GRMZM2G169709 | Phosphoethanolamine N-methyltransferase                                          | ON  | ON  | ON  | ON  | ON  |
| GRMZM2G169931 | Nonsense-mediated mRNA decay NMD3 family protein                                 | OFF | ON  | ON  | ON  | ON  |
| GRMZM2G173428 | FOG: RRM domain, CID11, nucleic acid binding                                     | OFF | ON  | OFF | ON  | ON  |
| GRMZM2G174574 | Acyl-CoA synthetase hypothetical protein                                         | OFF | OFF | OFF | ON  | OFF |
| GRMZM2G175676 | LOC100384862                                                                     | ON  | ON  | ON  | ON  | ON  |
| GRMZM2G175676 | RNA recognition motif, RNP-1                                                     | ON  | ON  | ON  | ON  | ON  |
| GRMZM2G177461 | Myo-inositol-1-phosphate synthase, inositol-3-phosphate synthase                 | ON  | ON  | ON  | ON  | ON  |
| GRMZM2G179215 | Ras GTPase                                                                       | ON  | ON  | ON  | ON  | ON  |
| GRMZM2G300786 | SWI1 / DYAD involved in meiotic recombination hypothetical protein               | ON  | ON  | OFF | ON  | ON  |
| GRMZM2G301405 | LOC100192986                                                                     | ON  | ON  | ON  | ON  | ON  |
| GRMZM2G310739 | 3-glucanase                                                                      | ON  | ON  | OFF | ON  | ON  |
| GRMZM2G315176 | DNA/RNA helicase, DEAD/DEAH box type, N-terminal                                 | ON  | ON  | ON  | ON  | ON  |
| GRMZM2G315726 | LAG1 longevity assurance homolog 3, ASC1                                         | ON  | ON  | ON  | ON  | ON  |
| GRMZM2G315726 | ASC1, WD-domain, sphingolipid biosynthesis, resists fungal infection             | ON  | ON  | ON  | ON  | ON  |
| GRMZM2G315769 | Sodium:dicarboxylate symporter                                                   | ON  | ON  | ON  | ON  | ON  |
| GRMZM2G324390 | Keratin, type I                                                                  | ON  | ON  | ON  | ON  | ON  |
| GRMZM2G324781 | SNF2 helicase domain-containing protein; DNA repair protein                      | ON  | ON  | ON  | ON  | ON  |
| GRMZM2G329710 | RAD16                                                                            | ON  | ON  | ON  | ON  | ON  |
| GRMZM2G336761 | EBNA-1, FAS1 domain Zinc finger, C3HC4 type (RING finger), U-box                 | ON  | ON  | ON  | ON  | ON  |
| GRMZM2G342807 | Permeases (Mycobacterium smegmatis str. MC2 155)                                 | ON  | ON  | ON  | ON  | ON  |
| GRMZM2G347717 | UDP-glucuronic acid decarboxylase, 3-beta-hydroxy-Delta(5)-steroid dehydrogenase | ON  | ON  | OFF | ON  | ON  |
| GRMZM2G349996 | Eukaryotic translation initiation factor 1A                                      | ON  | ON  | ON  | ON  | ON  |
| GRMZM2G351810 | bHLH transcription factor                                                        | OFF | ON  | OFF | ON  | ON  |
| GRMZM2G372180 | Calponin-like actin-binding                                                      | ON  | ON  | ON  | ON  | ON  |
| GRMZM2G390896 | Protein kinase-like                                                              | ON  | ON  | OFF | ON  | OFF |
| GRMZM2G408768 | 14-3-3 protein                                                                   | ON  | ON  | OFF | ON  | ON  |
| GRMZM2G410710 | Prohibitin, Mitochondrial prohibitin complex protein 1, membrane, PHB3           | ON  | ON  | ON  | ON  | ON  |
| GRMZM2G416019 | Leucine-rich repeat                                                              | OFF | OFF | OFF | OFF | OFF |
| GRMZM2G416069 | RecF/RecN/SMC protein, N-terminal                                                | OFF | OFF | OFF | OFF | ON  |
| GRMZM2G425986 | Endonuclease III-like, iron-sulphur                                              | ON  | ON  | ON  | ON  | ON  |

|               |                                                                                |     |     |     |     |     |     |
|---------------|--------------------------------------------------------------------------------|-----|-----|-----|-----|-----|-----|
|               | cluster loop                                                                   |     |     |     |     |     |     |
|               | ZmAGO121, AtAGO6 and AtAGO4 homolog (involved in RdDM)                         |     |     |     |     |     |     |
| GRMZM2G432075 | Zwille:pinhead-like                                                            | ON  | ON  | ON  | ON  | ON  | ON  |
| GRMZM2G447447 | Protein kinase-like                                                            | ON  | ON  | ON  | ON  | ON  | ON  |
| GRMZM2G456570 | SMCs flexible hinge                                                            | ON  | ON  | ON  | ON  | ON  | ON  |
| GRMZM2G456626 | Inositol 1,3,4-trisphosphate 5/6-kinase family protein                         | ON  | ON  | ON  | ON  | ON  | ON  |
| GRMZM2G457370 | AGO18b; similar to ZLL:PNH                                                     | OFF | OFF | OFF | OFF | ON  | ON  |
| GRMZM2G458974 | Ribosomal protein S7e family tRNA pseudouridine synthase D (TruD) <sup>†</sup> | OFF | ON  | OFF | ON  | OFF | OFF |
| GRMZM2G459702 | Exo70 exocyst complex subunit <sup>†</sup> (exocytosis)                        | ON  | ON  | ON  | ON  | ON  | ON  |
| GRMZM2G464382 | Transcription elongation factor, IIS                                           | OFF | OFF | OFF | ON  | OFF | OFF |
| GRMZM2G465553 | hypothetical protein                                                           | ON  | ON  | ON  | ON  | ON  | ON  |
| GRMZM2G468479 | LOC100217142                                                                   | ON  | ON  | ON  | ON  | ON  | ON  |
| GRMZM2G470438 | Zinc finger, GRF-type                                                          | ON  | ON  | ON  | ON  | ON  | ON  |
| GRMZM2G474929 | Selenium-binding protein-like Malonyl CoA-acyl carrier protein transacylase    | ON  | ON  | ON  | ON  | ON  | ON  |
| GRMZM2G547542 | NADH-dehydrogenase (ubiquinone) - FAD, NADP, NADPH binding, cytoplasm          | ON  | ON  | ON  | ON  | ON  | OFF |
| GRMZM2G563190 | FOG: Predicted E3 ubiquitin ligase, RHC1A                                      | ON  | ON  | ON  | ON  | ON  | ON  |
| GRMZM2G588241 | RecA family protein, NTP binding, DNA repair, ssDNA binding                    | ON  | ON  | ON  | ON  | ON  | ON  |
| GRMZM2G700757 | HSP70                                                                          | ON  | ON  | ON  | ON  | ON  | ON  |
| GRMZM5G802801 | FACT complex subunit SPT16 (Facilitates transcription via Pol II)              | ON  | ON  | ON  | ON  | ON  | ON  |
| GRMZM5G806358 | Alanine aminotransferase                                                       | ON  | ON  | ON  | ON  | ON  | ON  |
| GRMZM5G828630 | Poly [ADP-ribose] polymerase 1 (PARP-1)(EC 2.4.2.3                             | ON  | ON  | ON  | ON  | ON  | ON  |
| GRMZM5G831712 | Transcription initiation factor IIA gamma chain (TFIIA-gamma)                  | ON  | ON  | ON  | ON  | ON  | ON  |
| GRMZM5G832378 | Tryptophan synthase alpha                                                      | OFF | OFF | OFF | ON  | ON  | ON  |
| GRMZM5G841619 | Laccase 1, complete (oxygen binding - quinone associated)                      | ON  | ON  | ON  | ON  | ON  | ON  |
| GRMZM5G842071 | Meiotic recombination protein somatic embryogenesis receptor-like kinase1      | OFF | OFF | OFF | OFF | OFF | OFF |
| GRMZM5G856297 | like kinase1                                                                   | OFF | OFF | OFF | OFF | OFF | OFF |
| GRMZM5G870959 | Kinesin 1-like                                                                 | ON  | ON  | ON  | ON  | ON  | ON  |
| GRMZM5G878823 | UTP--glucose-1-phosphate uridylyltransferase                                   | ON  | ON  | ON  | ON  | ON  | ON  |
| GRMZM5G889299 | PAP/OAS1 substrate-binding domain superfamily, nucleotidyltransferase          | ON  | ON  | ON  | ON  | ON  | ON  |
| GRMZM5G890815 | Not determined - may be psuedogene                                             | OFF | OFF | OFF | ON  | ON  | ON  |
| GRMZM5G892926 | hypothetical protein                                                           | ON  | ON  | ON  | ON  | ON  | ON  |
| GRMZM5G899800 | LOC100272324                                                                   | ON  | ON  | ON  | ON  | ON  | ON  |

Expression patterns of genes classified as meiotic genes, including known genes involved in maize meiosis, maize homologs of meiotic genes in other flowering plants, and 222 annotated genes that are all mis-regulated in *ameiotic1* anthers were scored. Gene identifiers, Gene Ontology and their expressions (ON or OFF) are listed.

## Tables S8-S15

Available for download at <http://www.g3journal.org/lookup/suppl/doi:10.1534/g3.113.009738/-/DC1>

**Table S8 Candidate cell-type enriched transcripts as shown in Figure 7 Venn diagrams.** This file contains the feature numbers, Protein IDs, and log-fold enrichment of the hundreds or thousands of transcripts demonstrated to be significantly enriched in a particular anther cell type at the 0.7 mm stage of anther development, just after the formation of the presumptive middle layer and tapetum cell types by periclinal division of the SPL. The log-fold enrichment is a quantification by microarray hybridization of tissue-specific enrichment compared to whole anthers of the 0.7 mm stage. Towards the right side of the file (column S-U) there is a key describing the comparisons that made up each list. Abbreviations: MLT, middle layer & tapetum; EE, epidermis & endothecium; AR, archesporial cells; C & V, connective tissue and vasculature.

**Table S9 Pluripotency markers.** Transcripts rapidly quenched after the primordium stage (DOWN in 0.25 mm compared to 0.15mm, and DOWN again in 0.4 mm compared to 0.25 mm) were assigned as pluripotency markers if they were also upregulated in 0.4 mm *mac1* anthers. The logic is that pluripotency markers should have elevated expression in 0.4 mm *mac1* compared to 0.4 mm wild type because there are some remnant pluripotent L2-d cells in 0.4 mm *mac1* anthers that are absent in wild type, because all L2-d cells now have acquired a specific cell fate.

**Table S10 Transcripts enriched in or specific to wild type over *mac1* at 0.2 mm.** At the 0.2 mm stage, the AR are just starting to secrete the MAC1 protein ligand into the surrounding L2-d cells, triggering a periclinal division forming presumptive SPL and EN cell types while at the same time repressing AR proliferation. MAC1 suppression of AR proliferation could be a direct action of this protein on AR cells or an indirect consequence of L2-d specification initiated by MAC1. This list contains the early set of genes that are downregulated in the *mac1* mutant, potentially representing early markers for EN and SPL cell type identity or factors responsible for somatic niche construction.

**Table S11 Transcripts enriched in or specific to *mac1* over wild type at 0.2 mm.** This list contains the first upregulated (or 'de-repressed') genes in the *mac1* mutant when compared to wild type anthers of the same stage. Genes in this list may relate to L2-d pluripotency, which would normally be repressed upon construction of the SPL and EN.

**Table S12 Transcripts enriched in or specific to wild type over *mac1* at 0.4 mm.** At 0.4 mm in *mac1*, there is still no somatic bilayer formed – no SPL or EN cell types – rather a single layer of pluripotent L2-d remain uncommitted to a particular cellular fate. In addition, the AR population has doubled its size compared to wild type. This list contains the transcripts downregulated or missing in *mac1* mutant anthers at this stage, which may represent SPL or EN markers or genes normally turned off in AR cells to prevent their overproliferation.

**Table S13 Transcripts enriched in or specific to *mac1* over wild type at 0.4 mm.** This list may contain AR markers (as there are excess AR in *mac1* compared to wild type) and pluripotency markers for the L2-d cell type.

**Table S14 Transcripts enriched in or specific to *mac1* over wild type at both 0.2 and 0.4 mm stages.** compared to fertile anthers at the same stages. This list shows the overlap between the very early 0.2 mm anther and early 0.4 mm anther comparisons between *mac1* and wild type. This set may describe genes that are upregulated immediately downstream of *mac1* signal perception. Transcription factors are in bold.

**Table S15 Transcripts enriched in or specific to wild type over *mac1* at both 0.2 and 0.4 mm stages.** compared to fertile anthers at the same stages. Like Table S14, this list shows the overlap between 0.2 and 0.4 mm *mac1* vs. wild type comparisons – particularly the genes enriched in the *mac1* mutant. This set may contain genes downregulated immediately after *mac1* signal perception. Transcription factors are in bold.
