# Supplementary material for: Transcriptomes and Proteomes Define Gene Expression Progression in Pre-meiotic Maize Anthers
Source: PubMed Central journal article supplement (PMC4065268; doi:10.1534/g3.113.009738), 2014-06-01
Supplement: supp_4.6.993_TableS1.pdf [file supp_4.6.993_TableS1.pdf]

**Table S1 Comparative anther staging in *Arabidopsis thaliana* and *Zea mays*.**

| Arabidopsis          |                    |                                 | Maize          |                                       |              |           |
|----------------------|--------------------|---------------------------------|----------------|---------------------------------------|--------------|-----------|
| Anther stage         | Cell types         | Stamen length ( $\mu\text{m}$ ) | Cell types +   | Anther length ( $\mu\text{m}$ )       |              |           |
| <u>/floral stage</u> | <u>present</u>     | <u>Hours</u>                    | <u>/anther</u> | <u>anther event</u>                   | <u>Hours</u> |           |
| 1 / 1-5              | L1 L2 L3           | 96                              | <10/ no data   | L1 L2 primordium                      | 96           | 0-120     |
| 2 / 6                | EPI/AR             | 30                              | <20/no data    | EPI/L2-d/AR                           | 56           | 70-220    |
|                      |                    |                                 |                | specification                         |              |           |
| 3 / 7                | EPI/SPL/AR         | 24                              | <50/ no data   | EPI/EN/SPL/AR                         | 42           | 180-280   |
|                      |                    |                                 |                | Anticlinal mitotic proliferation      | 36           | 280-550   |
| 4 / 8                | EPI/EN/ML/TA/AR    | 24                              | 55-60/40       | EPI/EN/ML/TA/AR                       | 24           | 550-700   |
|                      | Specification done |                                 |                | Specification done                    |              |           |
|                      |                    |                                 |                | Anticlinal somatic cell proliferation | 48           | 700-1200  |
| 5 / 9                | PMC mature         | 60                              | 150/120        | PMC mature                            | 60           | 1000-1500 |
| 6 / 10               | Prophase 1 meiosis | 12                              | 300/240        | Prophase 1 meiosis                    | 48           | 1500-2000 |
| Total hours          |                    | <b>246</b>                      |                |                                       | <b>410</b>   |           |

Staging information for *A. thaliana* is taken from Smyth *et al.* (1990) and Sanders *et al.* (1999). Maize data are from Kelliher and Walbot (2011, 2012).
