# Supplementary material for: Transcriptomes and Proteomes Define Gene Expression Progression in Pre-meiotic Maize Anthers
Source: PubMed Central journal article supplement (PMC4065268; doi:10.1534/g3.113.009738), 2014-06-01
Supplement: supp_4.6.993_TableS5.pdf [file supp_4.6.993_TableS5.pdf]

**Table S5 Average intensities of hormone-related pathways.**

| Pathways                          | 0.15 mm | 0.25 mm | 0.4 mm | 0.7 mm | 1.0 mm |
|-----------------------------------|---------|---------|--------|--------|--------|
| <b>jasmonic acid biosynthesis</b> |         |         |        |        |        |
| GRMZM2G002959                     | 554.4   | 633.2   | 657.8  | 778.4  | 1323.3 |
| GRMZM2G009479                     | 244.1   | 303.1   | 300.6  | 333.5  | 298.2  |
| GRMZM2G014136                     | 152.5   | 142.7   | 140.7  | 104.9  | 175.5  |
| GRMZM2G015419                     | 108.5   | 91.5    | 83.3   | 114.4  | 113.1  |
| GRMZM2G033491                     | 290.2   | 244.3   | 218.9  | 397.5  | 352.7  |
| GRMZM2G052389                     | 267.5   | 183.6   | 137.7  | 172.4  | 177.3  |
| GRMZM2G072653 <sup>a</sup>        | 608.7   | 548.6   | 607.2  | 496.7  | 2133.3 |
| GRMZM2G077316 <sup>a,b</sup>      | 1044.6  | 1204.2  | 1328.3 | 1646.8 | 3669.4 |
| GRMZM2G082087                     | 142     | 145.7   | 149.1  | 161.7  | 270.1  |
| GRMZM2G087192 <sup>a</sup>        | 122.2   | 281.7   | 214.6  | 187.1  | 457.6  |
| GRMZM2G102760                     | 89.8    | 87.1    | 78.3   | 86.9   | 76.2   |
| GRMZM2G104843                     | 94.4    | 104.9   | 99.7   | 90.6   | 84.3   |
| GRMZM2G106250                     | 87      | 84.6    | 87.2   | 97.9   | 129.4  |
| GRMZM2G109056 <sup>a</sup>        | 4517    | 4803.9  | 4290.5 | 4761   | 2369.7 |
| GRMZM2G109130 <sup>a</sup>        | 1303.8  | 764.7   | 386.6  | 379.6  | 1768.2 |
| GRMZM2G110201 <sup>a,b</sup>      | 1409.9  | 1317.7  | 1390.3 | 1891.3 | 845.2  |
| GRMZM2G117357                     | 312.4   | 248     | 204.1  | 222.2  | 203.2  |
| GRMZM2G132903 <sup>a,b</sup>      | 508     | 531.1   | 549.5  | 423.2  | 1741.4 |
| GRMZM2G146885                     | 879.3   | 945.2   | 1017.6 | 646    | 998.2  |
| GRMZM2G148281                     | 1458.8  | 1271.5  | 1320   | 1378.5 | 1407.8 |
| GRMZM2G151087 <sup>a</sup>        | 3503.3  | 3650    | 3714.4 | 2928.4 | 8280.9 |
| GRMZM2G156712 <sup>a</sup>        | 143.4   | 161.7   | 165.6  | 111.4  | 230.1  |
| GRMZM2G156861 <sup>a</sup>        | 1133.5  | 432.6   | 199    | 112.5  | 3820.4 |
| GRMZM2G168404                     | 171.1   | 153.1   | 154.5  | 143.5  | 85.6   |
| GRMZM2G398500                     | 333.2   | 312.8   | 393.7  | 237.2  | 273.7  |
| GRMZM2G415793                     | 3569.9  | 3047.6  | 3782.3 | 7002.8 | 5972   |
| GRMZM2G459755                     | 84.9    | 92.7    | 98.2   | 90.9   | 72.3   |
| GRMZM5G862219 <sup>a</sup>        | 2417.9  | 2288.7  | 2159.6 | 2941.8 | 497.3  |
| GRMZM5G864319 <sup>b</sup>        | 1252.7  | 1061.9  | 1092   | 1407.4 | 546    |
| <b>IAA biosynthesis I</b>         |         |         |        |        |        |
| GRMZM2G022192                     | 123.9   | 115.2   | 113.2  | 128.2  | 93.7   |
| GRMZM2G066345                     | 122.6   | 148.1   | 153    | 87.7   | 139.8  |

|                                                                       |        |        |        |        |        |
|-----------------------------------------------------------------------|--------|--------|--------|--------|--------|
| GRMZM2G111225                                                         | 175.2  | 151    | 139.7  | 197.4  | 111.9  |
| GRMZM2G111309 <sup>a</sup>                                            | 181.9  | 174.4  | 170.6  | 109    | 224.3  |
| GRMZM2G117614 <sup>a</sup>                                            | 348.1  | 304.2  | 320.4  | 290.3  | 690.4  |
| GRMZM2G124175                                                         | 93.4   | 106.7  | 108.1  | 115.1  | 95.6   |
| GRMZM2G141473 <sup>a</sup>                                            | 72.9   | 77     | 102.7  | 765.2  | 179.9  |
| GRMZM2G141535 <sup>a</sup>                                            | 297.9  | 598.2  | 750.8  | 1532.8 | 1941.3 |
| GRMZM2G159542                                                         | 230.9  | 223.2  | 205.9  | 267.1  | 137    |
| GRMZM2G169087                                                         | 95.1   | 94.4   | 81.5   | 112.2  | 118    |
| GRMZM2G178517                                                         | 152.8  | 143.6  | 142.4  | 159.9  | 147.8  |
| GRMZM5G875732                                                         | 83.4   | 88.2   | 89.3   | 88.7   | 173.4  |
| <b>methyl indole-3-acetate interconversion</b>                        |        |        |        |        |        |
| GRMZM2G022934 <sup>a</sup>                                            | 3346.1 | 1403.8 | 500    | 101.6  | 8799.2 |
| GRMZM2G046558 <sup>b</sup>                                            | 4329.6 | 5738.9 | 5099.6 | 5581.9 | 4592.7 |
| GRMZM2G060732                                                         | 117.1  | 111.2  | 109.8  | 91.3   | 154.4  |
| GRMZM2G060760                                                         | 101.3  | 114.2  | 96     | 102    | 118.1  |
| GRMZM2G085402 <sup>a</sup>                                            | 476.1  | 355.3  | 295.7  | 305.2  | 649.7  |
| GRMZM2G085939                                                         | 108.9  | 101.1  | 104.6  | 102.9  | 82.5   |
| GRMZM2G100716                                                         | 254.4  | 318.9  | 388.6  | 419.9  | 774.5  |
| GRMZM2G168299                                                         | 996.6  | 959.4  | 1012.3 | 1334.8 | 1159.5 |
| GRMZM2G174315 <sup>a</sup>                                            | 377.1  | 501    | 380    | 959    | 826    |
| <b>GA12 biosynthesis</b>                                              |        |        |        |        |        |
| GRMZM2G059308 <sup>a</sup>                                            | 1993.6 | 3027   | 2477   | 1028.6 | 838.8  |
| GRMZM2G093195 <sup>a</sup>                                            | 95.7   | 220.5  | 336    | 216.7  | 72.3   |
| <b>gibberellin inactivation I (2<math>\beta</math>-hydroxylation)</b> |        |        |        |        |        |
| GRMZM2G022679 <sup>a</sup>                                            | 542.5  | 289.3  | 217.8  | 377.8  | 1122.9 |
| GRMZM2G051619 <sup>a</sup>                                            | 1610.7 | 721    | 685.9  | 614.3  | 1998.2 |
| GRMZM2G078798                                                         | 84.5   | 88.4   | 98.3   | 79     | 80.4   |
| GRMZM2G121700 <sup>b</sup>                                            | 94.8   | 100.5  | 98.7   | 104.1  | 152    |
| GRMZM2G147882                                                         | 362.1  | 406.4  | 548.9  | 1087.1 | 546.3  |
| GRMZM2G155686 <sup>a</sup>                                            | 247.3  | 127.4  | 108.3  | 111.1  | 234    |
| GRMZM2G427618                                                         | 76.5   | 77.9   | 79.1   | 76.7   | 120.6  |
| <b>brassinosteroid biosynthesis II</b>                                |        |        |        |        |        |
| GRMZM2G009681                                                         | 119.5  | 106.3  | 96.5   | 132.7  | 106.2  |
| GRMZM2G017678                                                         | 162    | 148.7  | 137.8  | 178.2  | 209.4  |
| GRMZM2G031169                                                         | 75.8   | 79.9   | 88     | 141.4  | 194.9  |
| GRMZM2G031311                                                         | 138.9  | 135.5  | 132.1  | 161    | 140    |

|                              |        |        |        |         |         |
|------------------------------|--------|--------|--------|---------|---------|
| GRMZM2G033555                | 5652.9 | 7145.3 | 9292.1 | 11727.9 | 12421.3 |
| GRMZM2G034069                | 1790.1 | 1910.1 | 1863.1 | 1169.4  | 1149.5  |
| GRMZM2G040397 <sup>a</sup>   | 611.8  | 739.9  | 756    | 635.6   | 1318.3  |
| GRMZM2G042179                | 159.8  | 156.6  | 139.3  | 164.4   | 200.8   |
| GRMZM2G044027 <sup>b</sup>   | 253.5  | 193.8  | 175.1  | 234.7   | 309     |
| GRMZM2G044281                | 144    | 162.4  | 127.9  | 158.2   | 90.1    |
| GRMZM2G052336 <sup>a,b</sup> | 73.4   | 119.2  | 295.7  | 1083.6  | 428.3   |
| GRMZM2G052357                | 785.4  | 872.1  | 739.9  | 608.3   | 1082.1  |
| GRMZM2G057328                | 1517.3 | 1194.5 | 1276.5 | 1203.5  | 1473.6  |
| GRMZM2G068917                | 628.2  | 409.3  | 454.2  | 303.9   | 338     |
| GRMZM2G069708                | 271.6  | 281.6  | 367.3  | 427.1   | 409.7   |
| GRMZM2G077531                | 194.1  | 193.2  | 231.8  | 269.9   | 226.5   |
| GRMZM2G107076 <sup>a</sup>   | 91.7   | 156.5  | 387.5  | 995.7   | 1725.4  |
| GRMZM2G108570 <sup>a</sup>   | 392.8  | 392.5  | 443.6  | 327.5   | 919.4   |
| GRMZM2G109589 <sup>a</sup>   | 145.6  | 116.4  | 107.1  | 183     | 84.3    |
| GRMZM2G110558                | 626    | 674.4  | 592.1  | 1096.5  | 2054.7  |
| GRMZM2G110881                | 114.5  | 119.8  | 150.8  | 212.2   | 127.1   |
| GRMZM2G123652                | 247.9  | 256.7  | 279.4  | 357.3   | 671.9   |
| GRMZM2G124434                | 395.3  | 244.4  | 209.8  | 300.6   | 565.5   |
| GRMZM2G138410                | 173    | 199.7  | 245.1  | 192.8   | 257     |
| GRMZM2G138907                | 176.3  | 143.7  | 135.4  | 169.7   | 117.6   |
| GRMZM2G143235                | 197.4  | 112.7  | 133.8  | 137.9   | 182.8   |
| GRMZM2G145460                | 139.7  | 150.9  | 150.9  | 142.1   | 106.9   |
| GRMZM2G149224                | 199.5  | 206.9  | 179.7  | 145.9   | 74      |
| GRMZM2G150541                | 337.1  | 289.3  | 314.3  | 398.7   | 389.9   |
| GRMZM2G154532 <sup>b</sup>   | 627.5  | 678.9  | 881.2  | 1288    | 972.3   |
| GRMZM2G165357                | 158.3  | 145.3  | 144.3  | 141     | 228.4   |
| GRMZM2G166767                | 1599.7 | 1861.6 | 2168.4 | 1973.7  | 2413.5  |
| GRMZM2G170336                | 8180.9 | 9132.8 | 8184.9 | 6000.7  | 5626.6  |
| GRMZM2G170812                | 333.4  | 353.5  | 649.3  | 851     | 513     |
| GRMZM2G171662                | 1166.7 | 1204.3 | 1225.6 | 1377.2  | 1253.1  |
| GRMZM2G179685                | 107.1  | 130.8  | 209.7  | 173.2   | 345.4   |
| GRMZM2G179981                | 554    | 347.5  | 275.7  | 365.4   | 221.4   |
| GRMZM2G180922                | 631.2  | 614.8  | 661.4  | 652     | 1031.7  |
| GRMZM2G300412                | 135.7  | 104.1  | 92.3   | 96.8    | 164.2   |
| GRMZM2G347717                | 146.6  | 134.7  | 143.8  | 205     | 317.7   |

|                                            |        |        |        |        |        |
|--------------------------------------------|--------|--------|--------|--------|--------|
| GRMZM2G370048                              | 135.1  | 162.7  | 158.5  | 152.1  | 300    |
| GRMZM2G381473 <sup>a</sup>                 | 364.8  | 413    | 498.8  | 854.3  | 306.2  |
| GRMZM2G468439 <sup>a</sup>                 | 199.1  | 147.7  | 156.3  | 189.9  | 824.1  |
| GRMZM2G469523                              | 2872.9 | 2978.7 | 3426.9 | 3411.9 | 4367.2 |
| <b>abscisic acid biosynthesis</b>          |        |        |        |        |        |
| GRMZM2G124175                              | 93.4   | 106.7  | 108.1  | 115.1  | 95.6   |
| GRMZM2G141473 <sup>a</sup>                 | 72.9   | 77     | 102.7  | 765.2  | 179.9  |
| GRMZM2G141535 <sup>a</sup>                 | 297.9  | 598.2  | 750.8  | 1532.8 | 1941.3 |
| GRMZM2G446858                              | 80.9   | 83.9   | 84.5   | 78.9   | 129.9  |
| <b>cytokinins-O-glucoside biosynthesis</b> |        |        |        |        |        |
| GRMZM2G004858 <sup>a</sup>                 | 90.2   | 92.9   | 85.3   | 385.6  | 72.1   |
| GRMZM2G022101                              | 167.3  | 106.2  | 104.4  | 99.8   | 137.7  |
| GRMZM2G022242                              | 314.7  | 357.2  | 421.3  | 277    | 358.8  |
| GRMZM2G031138                              | 92.1   | 123.5  | 149.7  | 131.6  | 126.3  |
| GRMZM2G036409                              | 134.2  | 104.4  | 93.8   | 117    | 115.1  |
| GRMZM2G041699 <sup>a</sup>                 | 135.9  | 122.4  | 87.1   | 120.7  | 390.2  |
| GRMZM2G043295                              | 288    | 259.7  | 248.8  | 254.9  | 225    |
| GRMZM2G058314                              | 438.4  | 434.5  | 475.8  | 439    | 555.6  |
| GRMZM2G061321                              | 76.2   | 108.5  | 126.4  | 95.8   | 71.1   |
| GRMZM2G063042                              | 113.6  | 104.9  | 106    | 136.3  | 89.7   |
| GRMZM2G073376                              | 182.5  | 169.6  | 186.8  | 235.2  | 214.9  |
| GRMZM2G082249 <sup>a</sup>                 | 158    | 196.7  | 239.3  | 297.3  | 673.8  |
| GRMZM2G083935                              | 72.3   | 90.9   | 121.9  | 95     | 65.2   |
| GRMZM2G085054                              | 706.3  | 548.5  | 396.1  | 409.7  | 767.4  |
| GRMZM2G095280                              | 440.5  | 299.1  | 254.1  | 227.1  | 260.5  |
| GRMZM2G096412                              | 72     | 87.1   | 134.2  | 82.4   | 134.2  |
| GRMZM2G098667                              | 414.4  | 359.1  | 352.8  | 314.6  | 320.3  |
| GRMZM2G113794 <sup>a</sup>                 | 350.8  | 537.8  | 542.5  | 476.1  | 981.7  |
| GRMZM2G118657                              | 68.5   | 71.9   | 84.2   | 73.4   | 70.6   |
| GRMZM2G122072                              | 136.6  | 149.7  | 119.5  | 121.8  | 136    |
| GRMZM2G142873 <sup>b</sup>                 | 196.5  | 224.8  | 239    | 200.3  | 188.9  |
| GRMZM2G156127                              | 179.1  | 212.9  | 359.2  | 239    | 163.4  |
| GRMZM2G159404                              | 215.6  | 196.7  | 203.7  | 244.9  | 295    |
| GRMZM2G160452                              | 207.8  | 277.9  | 257.8  | 294.2  | 215    |
| GRMZM2G160523 <sup>a</sup>                 | 94.3   | 95.2   | 91.6   | 102.9  | 586.6  |
| GRMZM2G161335                              | 729.9  | 721.3  | 777.7  | 975.9  | 747.1  |

|                                              |         |         |         |         |        |
|----------------------------------------------|---------|---------|---------|---------|--------|
| GRMZM2G165390 <sup>a</sup>                   | 447.9   | 390.9   | 412.5   | 776.8   | 3421.3 |
| GRMZM2G173926                                | 66.9    | 72.9    | 82.4    | 64.2    | 71.8   |
| GRMZM2G304712                                | 148.2   | 178.7   | 194.6   | 170.6   | 206.9  |
| GRMZM2G363554 <sup>a</sup>                   | 853.8   | 690.2   | 792.1   | 337.2   | 170.7  |
| GRMZM2G426415                                | 84.6    | 120     | 132.7   | 174.2   | 153    |
| GRMZM2G440902                                | 87.6    | 94.9    | 110.6   | 104.8   | 78.2   |
| GRMZM5G832805                                | 74.8    | 78      | 93.4    | 133.5   | 152.1  |
| <b>cytokinins degradation</b>                |         |         |         |         |        |
| GRMZM2G146644 <sup>a</sup>                   | 1502.9  | 1596.9  | 1706.3  | 846.6   | 420.2  |
| GRMZM2G167220                                | 103     | 105.8   | 113.9   | 101.6   | 121.3  |
| GRMZM2G348452 <sup>a</sup>                   | 1039.1  | 1353.8  | 1170.6  | 429.5   | 618.8  |
| GRMZM5G817173 <sup>a</sup>                   | 489.1   | 897.5   | 1297    | 572.2   | 1263.4 |
| <b>ethylene biosynthesis from methionine</b> |         |         |         |         |        |
| GRMZM2G006480 <sup>a</sup>                   | 69.5    | 122.2   | 237     | 126     | 252.7  |
| GRMZM2G013448                                | 265.2   | 215.4   | 137.5   | 270     | 393.8  |
| GRMZM2G018006                                | 145     | 138.6   | 138.7   | 107.8   | 68.6   |
| GRMZM2G026131                                | 137.8   | 132.4   | 140.8   | 152.7   | 168.8  |
| GRMZM2G029135 <sup>a</sup>                   | 360.5   | 422.5   | 554.8   | 824.5   | 108.7  |
| GRMZM2G033799 <sup>b</sup>                   | 1165.8  | 946.2   | 919.1   | 859.9   | 1077.1 |
| GRMZM2G053999 <sup>b</sup>                   | 3028.9  | 3931.2  | 3965.8  | 3922.1  | 2975.5 |
| GRMZM2G054361 <sup>a</sup>                   | 305.3   | 347.1   | 215.2   | 334.8   | 1066.7 |
| GRMZM2G067265 <sup>b</sup>                   | 1161.5  | 1202.3  | 1052.5  | 1325    | 1949.1 |
| GRMZM2G088064 <sup>a,b</sup>                 | 4767.7  | 6458.7  | 9210.4  | 12133.4 | 3546.9 |
| GRMZM2G094712 <sup>b</sup>                   | 95.6    | 105.2   | 105.5   | 158.3   | 84.5   |
| GRMZM2G107639 <sup>a,b</sup>                 | 457.1   | 652     | 1155.1  | 1384    | 692.4  |
| GRMZM2G117198 <sup>a,b</sup>                 | 16000.8 | 18729.9 | 18788.1 | 23193.1 | 9959.9 |
| GRMZM2G117230                                | 70.4    | 75.1    | 72.4    | 78.2    | 155    |
| GRMZM2G120302                                | 99.5    | 103.6   | 109.4   | 123.5   | 128.8  |
| GRMZM2G120563 <sup>b</sup>                   | 4605.6  | 5819.6  | 7347.5  | 4568.4  | 1953.1 |
| GRMZM2G126732 <sup>a</sup>                   | 142.2   | 241.9   | 234.4   | 211.8   | 1136.2 |
| GRMZM2G164405                                | 90.4    | 96.1    | 113     | 130     | 227.3  |
| GRMZM2G170595 <sup>a</sup>                   | 234.6   | 212.9   | 180.4   | 242.9   | 92     |
| GRMZM2G174145 <sup>a</sup>                   | 747.7   | 949.4   | 744.6   | 869     | 409.3  |
| GRMZM2G400604                                | 158.5   | 198.7   | 163.2   | 88.2    | 94.8   |
| GRMZM2G455945                                | 245.1   | 235.5   | 227.3   | 301.5   | 400.7  |
| GRMZM5G828630                                | 137.8   | 148.5   | 130     | 187.9   | 134.7  |

GRMZM5G840582

236.6

244.9

329.3

172.2

135.4

---

The average intensities from the array experiments for all the constitutively expressed transcripts belonging to the hormone-associated pathways with at least one transcript meeting the two-fold cutoff as highlighted by Pathway Tools Omics Viewer (<http://pathway.gemene.org/MAIZE/expression.html>).

<sup>a</sup> Genes with two-fold difference between at least two stages.

<sup>b</sup> The protein was detected in the mass spectrometry data.
